# Supplementary material for: Anti-aging effects of Ribes meyeri anthocyanins on neural stem cells and aging mice
Source: publisher site journal article supplement (doi:10.18632/aging.103955), 2020-09-12
Supplement: Supplementary file [file aging-v12i17-103955-supplementary-material-SD1.pdf]

SUPPLEMENTARY FIGURES

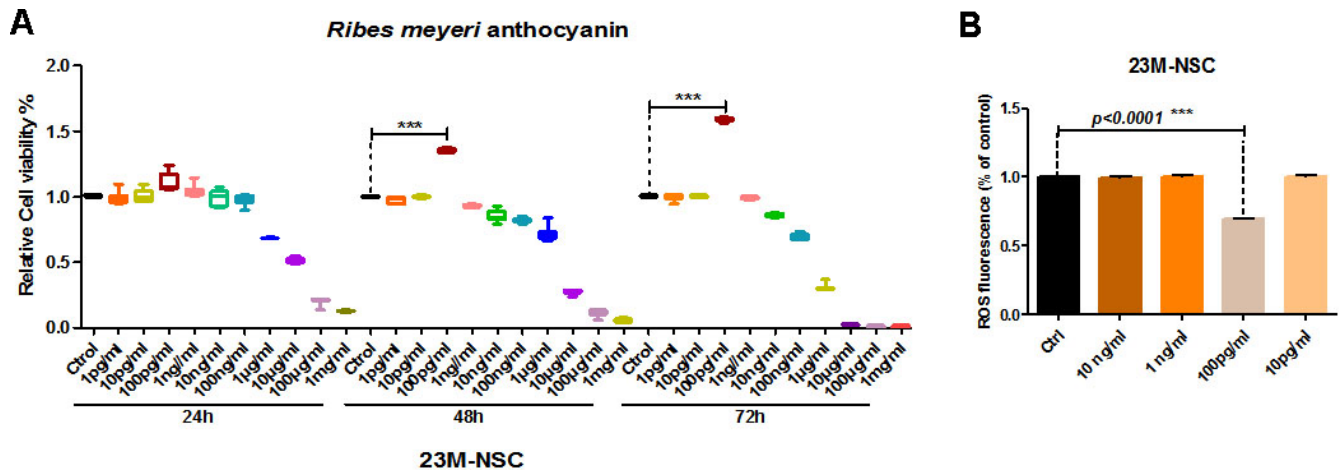

**Supplementary Figure 1. *Ribes meyeri* anthocyanin concentration screening.** (A) Optimal concentration of *R. meyeri* anthocyanins for promoting mouse neural stem cell (mNSC) proliferation. (B) Effects of 48 h of *R. meyeri* anthocyanin treatment on reactive oxygen species (ROS) levels. Data are presented as the mean  $\pm$  SD of three independent experiments. \* $P < 0.05$ , \*\* $P < 0.01$ , and \*\*\* $P < 0.0001$  compared with untreated cells.

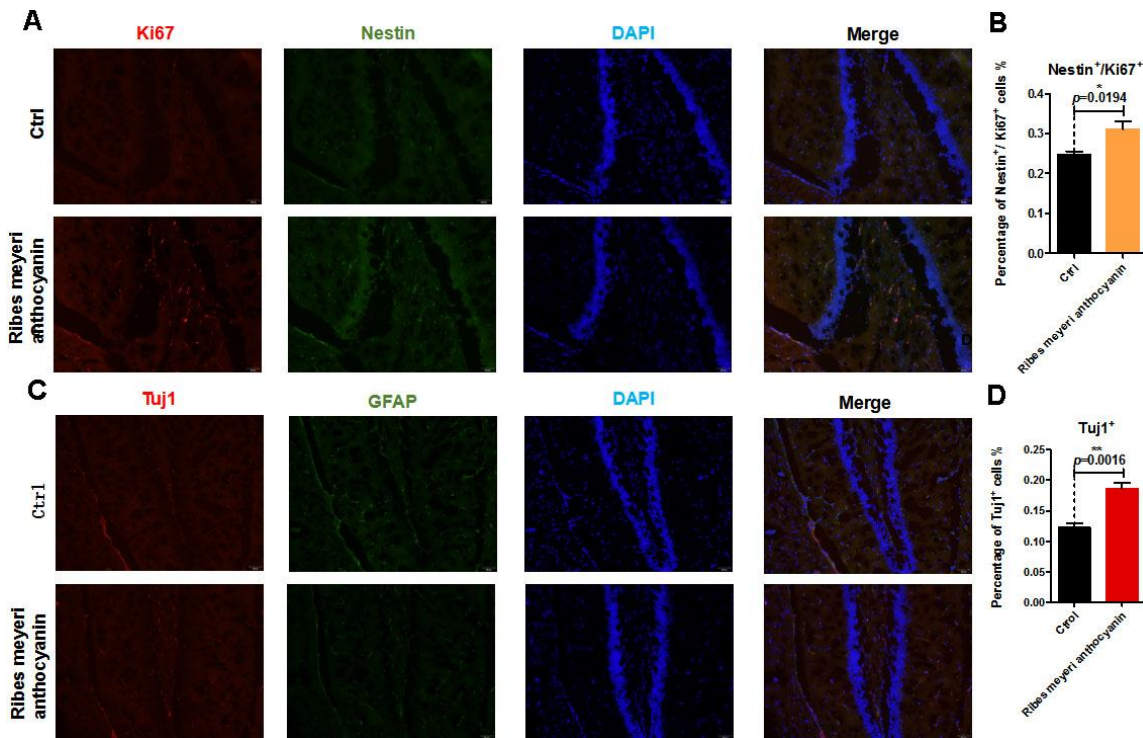

**Supplementary Figure 2. *Ribes meyeri* anthocyanin treatment enhances the number of neural stem cells and neurons in mice *in vivo*.** (A) Representative immunofluorescence images of nestin, Ki67, and nuclear (DAPI) staining in hippocampal regions of treated mice. (B) Percentage of nestin-/Ki67-positive cells in the hippocampus. (C) Representative immunofluorescence images of TuJ1, GFAP, and DAPI staining in hippocampal regions of treated mice (scale bar, 50  $\mu$ m). (D) Percentage of TuJ1-positive cells in the treated groups, normalized to controls. Data are presented as the mean  $\pm$  SD of three independent experiments. \* $P < 0.05$ , \*\* $P < 0.01$ , and \*\*\* $P < 0.0001$  compared with untreated mice.

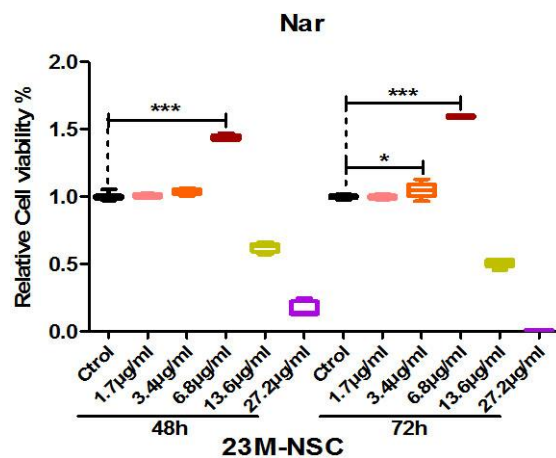

**Supplementary Figure 3. Naringenin (Nar) promotes cell viability of mouse neural stem cells (mNSCs) as determined by CCK-8 assay.** Data are presented as the mean  $\pm$  SD of three independent experiments. \* $P < 0.05$ , \*\* $P < 0.01$ , and \*\*\* $P < 0.0001$  compared with untreated cells.
