# Supplementary material for: Anti-aging effects of Ribes meyeri anthocyanins on neural stem cells and aging mice
Source: Aging (Albany NY). 2020 Sep 12;12(17):17738–53. doi: 10.18632/aging.103955 (PMC7521483; doi:10.18632/aging.103955)
Supplement: Supplementary Table 1 [file aging-12-103955-s001..xlsx]

## Sheet:  Identification_pos #
Supplementary Table 1. Metabolomic analysis of Ribes meyeri anthocyanins revealed that Nar may be an important flavonoid metabolite
1. Identification in positive ion mode
#	Pathway	Count	Pathway ID
1	Stilbenoid, diarylheptanoid and gingerol biosynthesis	15	map00945
2	Pentose and glucuronate interconversions	32	map00040
3	Plant hormone signal transduction	9	map04075
4	Benzoxazinoid biosynthesis	5	map00402
5	Biosynthesis of secondary metabolites	479	map01110	Biosynthesis of secondary metabolites:	2-Oxobutanoate, 2-Ketobutyric acid, 2-Oxobutyric acid, 2-Oxobutyrate, 2-Oxobutanoic acid, alpha-Ketobutyric acid, alpha-Ketobutyrate, , Naringenin, 4',5,7-Trihydroxyflavanone, (2S)-Naringenin, (-)-(2S)-Naringenin, , Naringenin chalcone, 2',4,4',6'-Tetrahydroxychalcone, Isosalipurpol, Chalconaringenin, , 2,7,4'-Trihydroxyisoflavanone, , 6,7,4'-Trihydroxyflavanone, , Deoxyshikonin, , Apigenin, 4',5…
6	Steroid biosynthesis	2	map00100
7	Monobactam biosynthesis	17	map00261
8	Brassinosteroid biosynthesis	4	map00905
9	Phenylalanine, tyrosine and tryptophan biosynthesis	25	map00400
10	Phenylpropanoid biosynthesis	49	map00940
11	Taurine and hypotaurine metabolism	7	map00430
12	Flavone and flavonol biosynthesis	33	map00944
13	Glycolysis / Gluconeogenesis	18	map00010
14	Inositol phosphate metabolism	20	map00562
15	Fatty acid elongation	1	map00062
16	Glutathione metabolism	8	map00480
17	Butanoate metabolism	11	map00650
18	beta-Alanine metabolism	6	map00410
19	Betalain biosynthesis	11	map00965
20	Alanine, aspartate and glutamate metabolism	11	map00250
21	Lipoic acid metabolism	1	map00785
22	Glyoxylate and dicarboxylate metabolism	13	map00630
23	Sulfur relay system	4	map04122
24	Pantothenate and CoA biosynthesis	13	map00770
25	Flavonoid biosynthesis	51	map00941	Flavonoid biosynthesis:	Naringenin, 4',5,7-Trihydroxyflavanone, (2S)-Naringenin, (-)-(2S)-Naringenin, , Naringenin chalcone, 2',4,4',6'-Tetrahydroxychalcone, Isosalipurpol, Chalconaringenin, , Butein, , Butin, (-)-Butin, 7,3',4'-Trihydroxyflavanone, , Garbanzol, 3,7,4'-Trihydroxyflavanone, , Pinobanksin, 3,5,7-Trihydroxyflavanone, , Apigenin, 4',5,7-Trihydroxyflavone, 5,7,4'-Trihydroxyflavone, , Galangin, 3,5,7-Trihydro…
26	Pyrimidine metabolism	14	map00240
27	Glycine, serine and threonine metabolism	12	map00260
28	Phosphonate and phosphinate metabolism	10	map00440
29	Tyrosine metabolism	50	map00350
30	Propanoate metabolism	13	map00640
31	Carbon metabolism	38	map01200
32	Carotenoid biosynthesis	21	map00906
33	Isoflavonoid biosynthesis	52	map00943	Isoflavonoid biosynthesis:	Naringenin, 4',5,7-Trihydroxyflavanone, (2S)-Naringenin, (-)-(2S)-Naringenin, , 3,6,9-Trihydroxypterocarpan, (6aS,11aS)-3,6a,9-Trihydroxypterocarpan, (-)-Glycinol, , 2'-Hydroxydihydrodaidzein, 2'-Hydroxy-2,3-dihydrodaidzein, , 2,7,4'-Trihydroxyisoflavanone, , 6,7,4'-Trihydroxyflavanone, , (-)-Vestitol, , Apigenin, 4',5,7-Trihydroxyflavone, 5,7,4'-Trihydroxyflavone, , 2'-Hydroxydaidzein, 3-(2,4-Di…
34	Cholesterol metabolism	2	map04979
35	Lysine degradation	13	map00310
36	Nitrogen metabolism	1	map00910
37	Sphingolipid metabolism	5	map00600
38	Biosynthesis of unsaturated fatty acids	16	map01040
39	AGE-RAGE signaling pathway in diabetic complications	1	map04933
40	Ascorbate and aldarate metabolism	25	map00053
41	Cyanoamino acid metabolism	22	map00460
42	Amino sugar and nucleotide sugar metabolism	36	map00520
43	Fructose and mannose metabolism	36	map00051
44	Starch and sucrose metabolism	25	map00500
45	Ubiquinone and other terpenoid-quinone biosynthesis	32	map00130
46	Selenocompound metabolism	2	map00450
47	Isoquinoline alkaloid biosynthesis	55	map00950
48	alpha-Linolenic acid metabolism	26	map00592
49	Monoterpenoid biosynthesis	41	map00902
50	Arginine biosynthesis	6	map00220
51	Biosynthesis of amino acids	72	map01230
52	Linoleic acid metabolism	27	map00591
53	One carbon pool by folate	3	map00670
54	Sulfur metabolism	10	map00920
55	Riboflavin metabolism	9	map00740
56	Vancomycin resistance	2	map01502
57	Fatty acid metabolism	1	map01212
58	C5-Branched dibasic acid metabolism	21	map00660
59	Oxidative phosphorylation	6	map00190
60	Terpenoid backbone biosynthesis	14	map00900
61	Diterpenoid biosynthesis	39	map00904
62	Phenylalanine metabolism	43	map00360
63	Phosphatidylinositol signaling system	7	map04070
64	Caffeine metabolism	13	map00232
65	ABC transporters	59	map02010
66	Synthesis and degradation of ketone bodies	1	map00072
67	Vitamin B6 metabolism	11	map00750
68	Thiamine metabolism	8	map00730
69	Photosynthesis	3	map00195
70	Cutin, suberine and wax biosynthesis	15	map00073
71	Tropane, piperidine and pyridine alkaloid biosynthesis	20	map00960
72	Cysteine and methionine metabolism	27	map00270
73	2-Oxocarboxylic acid metabolism	74	map01210
74	Folate biosynthesis	21	map00790
75	Glycerophospholipid metabolism	7	map00564
76	Biotin metabolism	4	map00780
77	Sesquiterpenoid and triterpenoid biosynthesis	24	map00909
78	Carbapenem biosynthesis	12	map00332
79	Anthocyanin biosynthesis	16	map00942
80	Glucosinolate biosynthesis	37	map00966
81	Citrate cycle (TCA cycle)	5	map00020
82	Pyruvate metabolism	9	map00620
83	Fatty acid biosynthesis	7	map00061
84	Purine metabolism	25	map00230
85	Histidine metabolism	18	map00340
86	Fatty acid degradation	3	map00071
87	Carbon fixation in photosynthetic organisms	10	map00710
88	Porphyrin and chlorophyll metabolism	31	map00860
89	Valine, leucine and isoleucine degradation	11	map00280
90	Nicotinate and nicotinamide metabolism	20	map00760
91	Glycerolipid metabolism	5	map00561
92	Metabolic pathways	625	map01100
93	Tryptophan metabolism	35	map00380
94	Galactose metabolism	35	map00052
95	Valine, leucine and isoleucine biosynthesis	19	map00290
96	Pentose phosphate pathway	20	map00030
97	Zeatin biosynthesis	20	map00908
98	Arginine and proline metabolism	31	map00330
99	Indole alkaloid biosynthesis	12	map00901
100	Arachidonic acid metabolism	68	map00590
101	Lysine biosynthesis	15	map00300
102	D-Arginine and D-ornithine metabolism	1	map00472
103	Acridone alkaloid biosynthesis	2	map01058
104	Mannose type O-glycan biosynthesis	1	map00515
105	Aminoacyl-tRNA biosynthesis	13	map00970

## Sheet:  Identification_neg #
Supplementary Table 1. Metabolomic analysis of Ribes meyeri anthocyanins revealed that naringenin (Nar) may be an important flavonoid metabolite
2. Identification in negative ion mode
#	Pathway	Count	Pathway ID
1	Phosphatidylinositol signaling system	4	map04070
2	Lysine biosynthesis	7	map00300
3	Pentose phosphate pathway	13	map00030
4	Arachidonic acid metabolism	6	map00590
5	Glycolysis / Gluconeogenesis	9	map00010
6	ABC transporters	33	map02010
7	Arginine biosynthesis	6	map00220
8	Carbapenem biosynthesis	3	map00332
9	Monobactam biosynthesis	8	map00261
10	beta-Alanine metabolism	1	map00410
11	Cysteine and methionine metabolism	1	map00270
12	Nicotinate and nicotinamide metabolism	8	map00760
13	Phenylalanine, tyrosine and tryptophan biosynthesis	8	map00400
14	Cyanoamino acid metabolism	2	map00460
15	Pantothenate and CoA biosynthesis	4	map00770
16	Propanoate metabolism	5	map00640
17	Anthocyanin biosynthesis	5	map00942
18	Carbon fixation in photosynthetic organisms	4	map00710
19	Aminoacyl-tRNA biosynthesis	3	map00970
20	Starch and sucrose metabolism	23	map00500
21	Zeatin biosynthesis	3	map00908
22	Valine, leucine and isoleucine biosynthesis	8	map00290
23	Alanine, aspartate and glutamate metabolism	6	map00250
24	Pyrimidine metabolism	4	map00240
25	Caffeine metabolism	14	map00232
26	Butanoate metabolism	7	map00650
27	Carbon metabolism	23	map01200
28	Glyoxylate and dicarboxylate metabolism	9	map00630
29	Fatty acid degradation	1	map00071
30	Citrate cycle (TCA cycle)	6	map00020
31	Metabolic pathways	241	map01100	Metabolic pathways:	Cellodextrin, Cellooligosaccharide, , Maltodextrin, Maltodextrin(n), Maltodextrin(n-2), n+2 Maltodextrin, Linear maltodextrin, Maltooligosaccharide, , 1-alpha-D-[(1->4)-alpha-D-Glucosyl](n-1)-alpha-D-glucopyranoside, 4-alpha-D-(1,4-alpha-D-Glucanosyl)n trehalose, Maltooligosyltrehalose, , Sucrose, Cane sugar, Saccharose, 1-alpha-D-Glucopyranosyl-2-beta-D-fructofuranoside, , Cellobiose, 1-beta-D-G…
32	Folate biosynthesis	5	map00790
33	Terpenoid backbone biosynthesis	5	map00900
34	Phosphonate and phosphinate metabolism	5	map00440
35	Pentose and glucuronate interconversions	20	map00040
36	Porphyrin and chlorophyll metabolism	10	map00860
37	Vitamin B6 metabolism	1	map00750
38	Biosynthesis of secondary metabolites	176	map01110
39	Valine, leucine and isoleucine degradation	1	map00280
40	Cutin, suberine and wax biosynthesis	8	map00073
41	Tyrosine metabolism	23	map00350
42	Thiamine metabolism	2	map00730
43	Nitrogen metabolism	1	map00910
44	Ubiquinone and other terpenoid-quinone biosynthesis	12	map00130
45	Fatty acid elongation	1	map00062
46	Glycerophospholipid metabolism	3	map00564
47	Biosynthesis of amino acids	27	map01230
48	Betalain biosynthesis	5	map00965
49	Indole alkaloid biosynthesis	12	map00901
50	Sulfur relay system	1	map04122
51	Pyruvate metabolism	6	map00620
52	Lipoic acid metabolism	2	map00785
53	Sesquiterpenoid and triterpenoid biosynthesis	1	map00909
54	Tryptophan metabolism	3	map00380
55	Stilbenoid, diarylheptanoid and gingerol biosynthesis	8	map00945
56	Glutathione metabolism	6	map00480
57	Glucosinolate biosynthesis	8	map00966
58	Biosynthesis of unsaturated fatty acids	5	map01040
59	Taurine and hypotaurine metabolism	3	map00430
60	Mannose type O-glycan biosynthesis	1	map00515
61	Isoflavonoid biosynthesis	44	map00943	Isoflavonoid biosynthesis:	Glyceocarpin, 2-Dimethylallyl-(6aS,11aS)-3,6a,9-trihydroxypterocarpan, , 4-Glyceollidin, 4-Dimethylallylglycinol, 4-Dimethylallyl-(6aS,11aS)-3,6a,9-trihydroxypterocarpan, , Pratensein, , 2'-Hydroxybiochanin A, Dehydroferreirin, , (+)-Sophorol, , (-)-Sophorol, , (+)-6a-Hydroxymaackiain, , Pisatin, (+)-Pisatin, , Genistein 7-O-beta-D-glucoside, Genistein, , 7-Hydroxy-2',4',5'-trimethoxyisoflavone, …
62	Plant hormone signal transduction	1	map04075
63	Fructose and mannose metabolism	27	map00051
64	Glycerolipid metabolism	1	map00561
65	alpha-Linolenic acid metabolism	7	map00592
66	Isoquinoline alkaloid biosynthesis	10	map00950
67	AGE-RAGE signaling pathway in diabetic complications	1	map04933
68	Linoleic acid metabolism	14	map00591
69	Flavone and flavonol biosynthesis	36	map00944
70	Sulfur metabolism	3	map00920
71	Lysine degradation	4	map00310
72	C5-Branched dibasic acid metabolism	17	map00660
73	Tropane, piperidine and pyridine alkaloid biosynthesis	4	map00960
74	Carotenoid biosynthesis	7	map00906
75	2-Oxocarboxylic acid metabolism	31	map01210
76	Inositol phosphate metabolism	14	map00562
77	Galactose metabolism	29	map00052
78	D-Arginine and D-ornithine metabolism	5	map00472
79	Purine metabolism	11	map00230
80	Selenocompound metabolism	5	map00450
81	Cholesterol metabolism	1	map04979
82	Phenylalanine metabolism	20	map00360
83	Flavonoid biosynthesis	33	map00941	Flavonoid biosynthesis:	Taxifolin, Dihydroquercetin, (+)-Dihydroquercetin, (+)-Taxifolin, trans-Dihydroquercetin, , Pentahydroxyflavanone, Dihydrotricetin, , Desmethylxanthohumol, , Bracteatin 6-O-glucoside, Bracteatin 6-O-beta-D-glucoside, , Dihydromyricetin, Ampelopsin, (+)-Dihydromyricetin, (+)-Ampelopsin, , Aureusidin 6-O-glucoside, Aureusidin 6-O-beta-D-glucoside, , Leucodelphinidin, , Pinobanksin 3-O-acetate, , 2'…
84	Fatty acid metabolism	1	map01212
85	Arginine and proline metabolism	13	map00330
86	Phenylpropanoid biosynthesis	14	map00940
87	Fatty acid biosynthesis	1	map00061
88	Oxidative phosphorylation	2	map00190
89	Monoterpenoid biosynthesis	6	map00902
90	Diterpenoid biosynthesis	9	map00904
91	Riboflavin metabolism	5	map00740
92	Histidine metabolism	6	map00340
93	Amino sugar and nucleotide sugar metabolism	23	map00520
94	Vancomycin resistance	1	map01502
95	Ascorbate and aldarate metabolism	24	map00053

## Sheet: Flavonoid biosynthesis (pos)
Flavonoid biosynthetic pathway was highly enriched among Ribes meyeri anthocyanins（positive ion mode）
Compound ID	ID	Adducts	Formula	Score	Fragmentation Score	Mass Error (ppm)	Isotope Similarity	Description	Charge	Retention time (min)	KEGG	Super Class	Class	Sub Class	Origin	Pathway
6.51_285.0772m/z	C01709	M+H-H2O	C16H14O6	55.8	97.8	4.72194	86.4633	Hesperetin; 3',5,7-Trihydroxy-4'-methoxyflavanone;	1	6.50898	C01709	Phenylpropanoids and polyketides	Flavonoids	O-methylated flavonoids	NULL	map00941 Flavonoid biosynthesis
6.51_285.0772m/z	C09756	M+H-H2O	C16H14O6	55.8	97.8	4.72194	86.4633	Homoeriodictyol; Eriodictyol 3'-methyl ether;	1	6.50898	C09756	null	null	null	NULL	map00941 Flavonoid biosynthesis
6.51_285.0772m/z	C16405	M+H-H2O	C16H14O6	55.8	97.8	4.72194	86.4633	Homoeriodictyol chalcone;	1	6.50898	C16405	null	null	null	NULL	map00941 Flavonoid biosynthesis
5.40_325.0702m/z	C01709	M+Na	C16H14O6	51.4	73.2	6.50848	91.1034	Hesperetin; 3',5,7-Trihydroxy-4'-methoxyflavanone;	1	5.40388	C01709	Phenylpropanoids and polyketides	Flavonoids	O-methylated flavonoids	NULL	map00941 Flavonoid biosynthesis
5.40_325.0702m/z	C09756	M+Na	C16H14O6	51.4	73.2	6.50848	91.1034	Homoeriodictyol; Eriodictyol 3'-methyl ether;	1	5.40388	C09756	null	null	null	NULL	map00941 Flavonoid biosynthesis
5.40_325.0702m/z	C16405	M+Na	C16H14O6	50.9	70.6	6.50848	91.1034	Homoeriodictyol chalcone;	1	5.40388	C16405	null	null	null	NULL	map00941 Flavonoid biosynthesis
5.40_311.0548m/z	C00974	M+Na	C15H12O6	50.5	67.1	7.5347	93.6427	Dihydrokaempferol; Aromadendrin; (+)-Dihydrokaempferol; (+)-Aromadendrin;	1	5.40388	C00974	Phenylpropanoids and polyketides	Flavonoids	Flavans	NULL	map00941 Flavonoid biosynthesis; map01061 Biosynthesis of phenylpropanoids; map01100 Metabolic pathways; map01110 Biosynthesis of secondary metabolites
5.40_311.0548m/z	C05631	M+Na	C15H12O6	50.4	67	7.5347	93.6427	Eriodictyol;	1	5.40388	C05631	Phenylpropanoids and polyketides	Flavonoids	Flavans	NULL	map00941 Flavonoid biosynthesis; map01110 Biosynthesis of secondary metabolites
5.40_311.0548m/z	C01378	M+Na	C15H12O6	50.2	65.7	7.5347	93.6427	Fustin; 2,3-Dihydrofisetin;	1	5.40388	C01378	null	null	null	NULL	map00941 Flavonoid biosynthesis
5.40_311.0548m/z	C15525	M+Na	C15H12O6	50.2	65.6	7.5347	93.6427	Eriodictyol chalcone; 2',3,4,4',6'-Pentahydroxychalcone;	1	5.40388	C15525	Phenylpropanoids and polyketides	Linear 1,3-diarylpropanoids	Chalcones and dihydrochalcones	NULL	map00941 Flavonoid biosynthesis
4.46_286.0473n	C05903	M+H-H2O, M+H	C15H10O6	49.8	52	-1.67146	99.1813	Kaempferol; 3,4',5,7-Tetrahydroxyflavone; 3,5,7-Trihydroxy-2-(4-hydroxyphenyl)-4H-1-benzopyran-4-one; 5,7,4'-Trihydroxyflavonol; C.I. 75640; Indigo yellow; Kaempherol; Kempferol; Nimbecetin; Pelargidenolon; Populnetin; Rhamnolutein; Rhamnolutin; Robigenin; Swartziol; Trifolitin;	1	4.4615	C05903	Phenylpropanoids and polyketides	Flavonoids	Flavones	NULL	map00941 Flavonoid biosynthesis; map00944 Flavone and flavonol biosynthesis; map01061 Biosynthesis of phenylpropanoids; map01100 Metabolic pathways; map01110 Biosynthesis of secondary metabolites
5.43_433.1127m/z	C01460	M+H	C21H20O10	48.7	51.3	-0.401266	92.8462	Vitexin; Apigenin 8-C-glucoside;	1	5.43245	C01460	null	null	null	NULL	map00941 Flavonoid biosynthesis; map00944 Flavone and flavonol biosynthesis
4.54_303.0501m/z	C00389	M+H	C15H10O7	48.7	47.4	0.659932	96.8129	Quercetin; 3,3',4,5,7-Pentahydroxyflavone; 3,5,7,3',4'-Pentahydroxyflavone;	1	4.53973	C00389	Phenylpropanoids and polyketides	Flavonoids	Flavones	NULL	map00941 Flavonoid biosynthesis; map00944 Flavone and flavonol biosynthesis; map01100 Metabolic pathways; map01110 Biosynthesis of secondary metabolites; map04152 AMPK signaling pathway
4.54_303.0501m/z	C10192	M+H	C15H10O7	48.1	44.7	0.659932	96.8129	Tricetin; 5,7,3',4',5'-Pentahydroxyflavone;	1	4.53973	C10192	Phenylpropanoids and polyketides	Flavonoids	Flavones	NULL	map00941 Flavonoid biosynthesis
5.43_433.1127m/z	C16408	M+H-H2O	C21H22O11	47.9	47.3	-0.385214	92.7033	2',3,4,4',6'-Peptahydroxychalcone 4'-O-glucoside; PHC 4'-O-glucoside; 2',3,4,4',6'-Pentahydroxychalcone 4'-O-beta-D-glucoside;	1	5.43245	C16408	null	null	null	NULL	map00941 Flavonoid biosynthesis
4.54_303.0501m/z	C02906	M+H-H2O	C15H12O8	47.8	43.1	0.62279	96.5606	Dihydromyricetin; Ampelopsin; (+)-Dihydromyricetin; (+)-Ampelopsin;	1	4.53973	C02906	null	null	null	NULL	map00941 Flavonoid biosynthesis; map01110 Biosynthesis of secondary metabolites
5.42_271.0607m/z	C05631	M+H-H2O	C15H12O6	47.7	44.2	2.22035	96.7284	Eriodictyol;	1	5.41817	C05631	Phenylpropanoids and polyketides	Flavonoids	Flavans	NULL	map00941 Flavonoid biosynthesis; map01110 Biosynthesis of secondary metabolites
5.42_271.0607m/z	C00974	M+H-H2O	C15H12O6	47.7	44.2	2.22035	96.7284	Dihydrokaempferol; Aromadendrin; (+)-Dihydrokaempferol; (+)-Aromadendrin;	1	5.41817	C00974	Phenylpropanoids and polyketides	Flavonoids	Flavans	NULL	map00941 Flavonoid biosynthesis; map01061 Biosynthesis of phenylpropanoids; map01100 Metabolic pathways; map01110 Biosynthesis of secondary metabolites
5.00_318.0361n	C10107	M+H-H2O, M+H	C15H10O8	47	43.1	-4.62523	97.4489	Myricetin; 3,5,7,3',4',5'-Hexahydroxyflavone;	1	4.99622	C10107	Phenylpropanoids and polyketides	Flavonoids	Flavones	NULL	map00941 Flavonoid biosynthesis; map00944 Flavone and flavonol biosynthesis
6.05_285.0754m/z	C01709	M+H-H2O	C16H14O6	46.6	39.2	-1.1994	95.0753	Hesperetin; 3',5,7-Trihydroxy-4'-methoxyflavanone;	1	6.04537	C01709	Phenylpropanoids and polyketides	Flavonoids	O-methylated flavonoids	NULL	map00941 Flavonoid biosynthesis
6.05_285.0754m/z	C09756	M+H-H2O	C16H14O6	46.6	39.2	-1.1994	95.0753	Homoeriodictyol; Eriodictyol 3'-methyl ether;	1	6.04537	C09756	null	null	null	NULL	map00941 Flavonoid biosynthesis
6.05_285.0754m/z	C16405	M+H-H2O	C16H14O6	46.5	39.1	-1.1994	95.0753	Homoeriodictyol chalcone;	1	6.04537	C16405	null	null	null	NULL	map00941 Flavonoid biosynthesis
6.49_256.0732n	C09827	M+H-H2O, M+Na	C15H12O4	46.5	34.9	-1.35471	99.1019	Pinocembrin; 5,7-Dihydroxyflavanone;	1	6.4947	C09827	Phenylpropanoids and polyketides	Flavonoids	Flavans	NULL	map00941 Flavonoid biosynthesis
4.46_286.0473n	C01514	M+H-H2O, M+H	C15H10O6	46.3	34.3	-1.67146	99.1813	Luteolin; 3',4',5,7-Tetrahydroxyflavone; 5,7,3',4'-Tetrahydroxyflavone;	1	4.4615	C01514	Phenylpropanoids and polyketides	Flavonoids	Flavones	NULL	map00941 Flavonoid biosynthesis; map00944 Flavone and flavonol biosynthesis; map01100 Metabolic pathways; map01110 Biosynthesis of secondary metabolites
6.49_256.0732n	C09762	M+H-H2O, M+Na	C15H12O4	46	32.5	-1.35471	99.1019	Liquiritigenin; 7,4'-Dihydroxyflavanone;	1	6.4947	C09762	null	null	null	NULL	map00941 Flavonoid biosynthesis; map00943 Isoflavonoid biosynthesis; map01061 Biosynthesis of phenylpropanoids; map01110 Biosynthesis of secondary metabolites
5.42_271.0607m/z	C01477	M+H	C15H10O5	46	35.6	2.36844	96.982	Apigenin; 4',5,7-Trihydroxyflavone; 5,7,4'-Trihydroxyflavone;	1	5.41817	C01477	Phenylpropanoids and polyketides	Flavonoids	Flavones	NULL	map00941 Flavonoid biosynthesis; map00943 Isoflavonoid biosynthesis; map00944 Flavone and flavonol biosynthesis; map01061 Biosynthesis of phenylpropanoids; map01100 Metabolic pathways; map01110 Biosynthesis of secondary metabolites
5.42_271.0607m/z	C10044	M+H	C15H10O5	46	35.6	2.36844	96.982	Galangin; 3,5,7-Trihydroxyflavone;	1	5.41817	C10044	Phenylpropanoids and polyketides	Flavonoids	Flavones	NULL	map00941 Flavonoid biosynthesis
5.42_271.0607m/z	C01378	M+H-H2O	C15H12O6	45.9	35.4	2.22035	96.7284	Fustin; 2,3-Dihydrofisetin;	1	5.41817	C01378	null	null	null	NULL	map00941 Flavonoid biosynthesis
5.42_271.0607m/z	C15525	M+H-H2O	C15H12O6	45.9	35.4	2.22035	96.7284	Eriodictyol chalcone; 2',3,4,4',6'-Pentahydroxychalcone;	1	5.41817	C15525	Phenylpropanoids and polyketides	Linear 1,3-diarylpropanoids	Chalcones and dihydrochalcones	NULL	map00941 Flavonoid biosynthesis
5.64_313.0702m/z	C06562	M+Na	C15H14O6	45.7	52.2	6.67733	83.7484	(+)-Catechin; D-Catechin; Cyanidanol; (2R-trans)-2-(3,4-Dihydroxyphenyl)-3,4-dihydro-2H-1-benzopyran-3,5,7-triol; (2R,3S)-Catechin; (2R,3S)-(+)-Catechin; Cianidanol;	1	5.6389	C06562	Phenylpropanoids and polyketides	Flavonoids	Flavans	NULL	map00941 Flavonoid biosynthesis; map01061 Biosynthesis of phenylpropanoids; map01110 Biosynthesis of secondary metabolites
5.64_313.0702m/z	C09727	M+Na	C15H14O6	45.7	52.2	6.67733	83.7484	(-)-Epicatechin;	1	5.6389	C09727	Phenylpropanoids and polyketides	Flavonoids	Flavans	NULL	map00941 Flavonoid biosynthesis; map01061 Biosynthesis of phenylpropanoids; map01110 Biosynthesis of secondary metabolites
5.64_313.0702m/z	C05907	M+Na	C15H14O6	45.7	52.2	6.67733	83.7484	Luteoforol; 3-Deoxyleucocyanidin;	1	5.6389	C05907	null	null	null	NULL	map00941 Flavonoid biosynthesis
4.57_301.0338m/z	C10107	M+H-H2O	C15H10O8	45.6	46.4	-1.58271	83.3887	Myricetin; 3,5,7,3',4',5'-Hexahydroxyflavone;	1	4.56855	C10107	Phenylpropanoids and polyketides	Flavonoids	Flavones	NULL	map00941 Flavonoid biosynthesis; map00944 Flavone and flavonol biosynthesis
4.94_303.0499m/z	C00389	M+H	C15H10O7	44.6	26.6	-0.0540264	96.5735	Quercetin; 3,3',4,5,7-Pentahydroxyflavone; 3,5,7,3',4'-Pentahydroxyflavone;	1	4.93847	C00389	Phenylpropanoids and polyketides	Flavonoids	Flavones	NULL	map00941 Flavonoid biosynthesis; map00944 Flavone and flavonol biosynthesis; map01100 Metabolic pathways; map01110 Biosynthesis of secondary metabolites; map04152 AMPK signaling pathway
5.64_313.0702m/z	C03648	M+Na	C15H14O6	43.3	40.2	6.67733	83.7484	cis-3,4-Leucopelargonidin;	1	5.6389	C03648	Phenylpropanoids and polyketides	Flavonoids	Flavans	NULL	map00941 Flavonoid biosynthesis; map01100 Metabolic pathways; map01110 Biosynthesis of secondary metabolites
4.63_271.0595m/z	C00974	M+H-H2O	C15H12O6	42.6	16.8	-1.91517	98.6909	Dihydrokaempferol; Aromadendrin; (+)-Dihydrokaempferol; (+)-Aromadendrin;	1	4.62615	C00974	Phenylpropanoids and polyketides	Flavonoids	Flavans	NULL	map00941 Flavonoid biosynthesis; map01061 Biosynthesis of phenylpropanoids; map01100 Metabolic pathways; map01110 Biosynthesis of secondary metabolites
6.06_302.0427n	C00389	M+H, M+Na	C15H10O7	42.6	15.1	0.246623	98.3314	Quercetin; 3,3',4,5,7-Pentahydroxyflavone; 3,5,7,3',4'-Pentahydroxyflavone;	1	6.05967	C00389	Phenylpropanoids and polyketides	Flavonoids	Flavones	NULL	map00941 Flavonoid biosynthesis; map00944 Flavone and flavonol biosynthesis; map01100 Metabolic pathways; map01110 Biosynthesis of secondary metabolites; map04152 AMPK signaling pathway
6.06_302.0427n	C10192	M+H, M+Na	C15H10O7	42.6	15.1	0.246623	98.3314	Tricetin; 5,7,3',4',5'-Pentahydroxyflavone;	1	6.05967	C10192	Phenylpropanoids and polyketides	Flavonoids	Flavones	NULL	map00941 Flavonoid biosynthesis
6.49_256.0732n	C16404	M+H-H2O, M+Na	C15H12O4	42.4	14.5	-1.35471	99.1019	Pinocembrin chalcone;	1	6.4947	C16404	null	null	null	NULL	map00941 Flavonoid biosynthesis
4.63_271.0595m/z	C05631	M+H-H2O	C15H12O6	42.2	14.8	-1.91517	98.6909	Eriodictyol;	1	4.62615	C05631	Phenylpropanoids and polyketides	Flavonoids	Flavans	NULL	map00941 Flavonoid biosynthesis; map01110 Biosynthesis of secondary metabolites
5.64_313.0702m/z	C09736	M+Na	C15H14O6	42.1	34.1	6.67733	83.7484	Fisetinidol-4beta-ol; (-)-Mollisacacidin; Fisetinin-3,4-diol; 5-Deoxyleucocyanidin;	1	5.6389	C09736	null	null	null	NULL	map00941 Flavonoid biosynthesis
4.63_271.0595m/z	C01378	M+H-H2O	C15H12O6	41.9	13.3	-1.91517	98.6909	Fustin; 2,3-Dihydrofisetin;	1	4.62615	C01378	null	null	null	NULL	map00941 Flavonoid biosynthesis
6.49_256.0732n	C08650	M+H-H2O, M+Na	C15H12O4	41.8	11.4	-1.35471	99.1019	Isoliquiritigenin;	1	6.4947	C08650	Phenylpropanoids and polyketides	Linear 1,3-diarylpropanoids	Chalcones and dihydrochalcones	NULL	map00941 Flavonoid biosynthesis; map01061 Biosynthesis of phenylpropanoids; map01110 Biosynthesis of secondary metabolites
4.63_433.1161m/z	C01460	M+H	C21H20O10	41.6	17.9	7.37472	98.543	Vitexin; Apigenin 8-C-glucoside;	1	4.62615	C01460	null	null	null	NULL	map00941 Flavonoid biosynthesis; map00944 Flavone and flavonol biosynthesis
4.63_305.0653m/z	C05911	M+H	C15H12O7	41.6	11.7	-0.765037	97.3495	Pentahydroxyflavanone; Dihydrotricetin;	1	4.62615	C05911	null	null	null	NULL	map00941 Flavonoid biosynthesis; map01110 Biosynthesis of secondary metabolites
4.95_271.0600m/z	C05631	M+H-H2O	C15H12O6	41.6	13	-0.352249	95.2458	Eriodictyol;	1	4.95293	C05631	Phenylpropanoids and polyketides	Flavonoids	Flavans	NULL	map00941 Flavonoid biosynthesis; map01110 Biosynthesis of secondary metabolites
4.22_289.0698m/z	C05631	M+H	C15H12O6	41.6	14.4	-2.97236	97.2665	Eriodictyol;	1	4.21862	C05631	Phenylpropanoids and polyketides	Flavonoids	Flavans	NULL	map00941 Flavonoid biosynthesis; map01110 Biosynthesis of secondary metabolites
4.22_302.0436n	C00389	M+H-H2O, M+H	C15H10O7	41.6	15.3	3.24702	96.4402	Quercetin; 3,3',4,5,7-Pentahydroxyflavone; 3,5,7,3',4'-Pentahydroxyflavone;	1	4.21862	C00389	Phenylpropanoids and polyketides	Flavonoids	Flavones	NULL	map00941 Flavonoid biosynthesis; map00944 Flavone and flavonol biosynthesis; map01100 Metabolic pathways; map01110 Biosynthesis of secondary metabolites; map04152 AMPK signaling pathway
4.32_465.1028m/z	C16410	M+H	C21H20O12	41.5	15.8	0.0398026	91.5417	Bracteatin 6-O-glucoside; Bracteatin 6-O-beta-D-glucoside;	1	4.31863	C16410	null	null	null	NULL	map00941 Flavonoid biosynthesis
4.22_289.0698m/z	C05906	M+H-H2O	C15H14O7	41.2	12.3	-2.79746	97.0126	Leucocyanidin; 2-(3,4-Dihydroxyphenyl)-3,4-dihydro-2H-1-benzopyran-3,4,5,7-tetrol; 3,3',4,4',5,7-Flavanhexol; 3,4-Cyanidiol; Leucoanthocyanidol; Leucocianidol; Leucocyanidol; Leukocyanidine; Procyanidol; Resivit; 2,3-trans-3,4-cis-Leucocyanidin;	1	4.21862	C05906	null	null	null	NULL	map00941 Flavonoid biosynthesis; map01061 Biosynthesis of phenylpropanoids; map01110 Biosynthesis of secondary metabolites
4.63_305.0653m/z	C01617	M+H	C15H12O7	41.2	9.8	-0.765037	97.3495	Taxifolin; Dihydroquercetin; (+)-Dihydroquercetin; (+)-Taxifolin; trans-Dihydroquercetin;	1	4.62615	C01617	null	null	null	NULL	map00941 Flavonoid biosynthesis; map01061 Biosynthesis of phenylpropanoids; map01100 Metabolic pathways; map01110 Biosynthesis of secondary metabolites
4.63_433.1161m/z	C16408	M+H-H2O	C21H22O11	41	14.2	7.07963	98.6279	2',3,4,4',6'-Peptahydroxychalcone 4'-O-glucoside; PHC 4'-O-glucoside; 2',3,4,4',6'-Pentahydroxychalcone 4'-O-beta-D-glucoside;	1	4.62615	C16408	null	null	null	NULL	map00941 Flavonoid biosynthesis
5.49_649.1576m/z	C09806	M+K	C28H34O15	40.8	25.9	7.63768	86.6261	Neohesperidin; Hesperetin 7-O-neohesperidoside;	1	5.4896	C09806	null	null	null	NULL	map00941 Flavonoid biosynthesis
6.05_270.0529n	C01477	M+H, M+Na, M+H-H2O	C15H10O5	40.5	5.78	0.123042	96.8215	Apigenin; 4',5,7-Trihydroxyflavone; 5,7,4'-Trihydroxyflavone;	1	6.04537	C01477	Phenylpropanoids and polyketides	Flavonoids	Flavones	NULL	map00941 Flavonoid biosynthesis; map00943 Isoflavonoid biosynthesis; map00944 Flavone and flavonol biosynthesis; map01061 Biosynthesis of phenylpropanoids; map01100 Metabolic pathways; map01110 Biosynthesis of secondary metabolites
6.05_270.0529n	C10044	M+H, M+Na, M+H-H2O	C15H10O5	40.5	6	0.123042	96.8215	Galangin; 3,5,7-Trihydroxyflavone;	1	6.04537	C10044	Phenylpropanoids and polyketides	Flavonoids	Flavones	NULL	map00941 Flavonoid biosynthesis
4.22_289.0698m/z	C00974	M+H	C15H12O6	40.2	7.48	-2.97236	97.2665	Dihydrokaempferol; Aromadendrin; (+)-Dihydrokaempferol; (+)-Aromadendrin;	1	4.21862	C00974	Phenylpropanoids and polyketides	Flavonoids	Flavans	NULL	map00941 Flavonoid biosynthesis; map01061 Biosynthesis of phenylpropanoids; map01100 Metabolic pathways; map01110 Biosynthesis of secondary metabolites
5.61_319.0439m/z	C10107	M+H	C15H10O8	40.2	4.92	-2.93851	99.5097	Myricetin; 3,5,7,3',4',5'-Hexahydroxyflavone;	1	5.61033	C10107	Phenylpropanoids and polyketides	Flavonoids	Flavones	NULL	map00941 Flavonoid biosynthesis; map00944 Flavone and flavonol biosynthesis
4.22_289.0698m/z	C12127	M+H-H2O	C15H14O7	40.1	6.74	-2.79746	97.0126	(+)-Gallocatechin; Gallocatechol;	1	4.21862	C12127	Phenylpropanoids and polyketides	Flavonoids	Flavans	NULL	map00941 Flavonoid biosynthesis; map01110 Biosynthesis of secondary metabolites
4.22_289.0698m/z	C12136	M+H-H2O	C15H14O7	40.1	6.74	-2.79746	97.0126	(-)-Epigallocatechin; Epigallocatechol;	1	4.21862	C12136	Phenylpropanoids and polyketides	Flavonoids	Flavans	NULL	map00941 Flavonoid biosynthesis; map01110 Biosynthesis of secondary metabolites
4.22_289.0698m/z	C01378	M+H	C15H12O6	40.1	6.73	-2.97236	97.2665	Fustin; 2,3-Dihydrofisetin;	1	4.21862	C01378	null	null	null	NULL	map00941 Flavonoid biosynthesis
5.20_285.0394m/z	C00389	M+H-H2O	C15H10O7	40.1	17	0.0629059	83.5874	Quercetin; 3,3',4,5,7-Pentahydroxyflavone; 3,5,7,3',4'-Pentahydroxyflavone;	1	5.20368	C00389	Phenylpropanoids and polyketides	Flavonoids	Flavones	NULL	map00941 Flavonoid biosynthesis; map00944 Flavone and flavonol biosynthesis; map01100 Metabolic pathways; map01110 Biosynthesis of secondary metabolites; map04152 AMPK signaling pathway
5.20_285.0394m/z	C10192	M+H-H2O	C15H10O7	40.1	16.8	0.0629059	83.5874	Tricetin; 5,7,3',4',5'-Pentahydroxyflavone;	1	5.20368	C10192	Phenylpropanoids and polyketides	Flavonoids	Flavones	NULL	map00941 Flavonoid biosynthesis
5.14_301.0332m/z	C10107	M+H-H2O	C15H10O8	40	20.6	-3.4814	83.3887	Myricetin; 3,5,7,3',4',5'-Hexahydroxyflavone;	1	5.1401	C10107	Phenylpropanoids and polyketides	Flavonoids	Flavones	NULL	map00941 Flavonoid biosynthesis; map00944 Flavone and flavonol biosynthesis
4.63_271.0595m/z	C01477	M+H	C15H10O5	40	3.39	-2.04289	98.9392	Apigenin; 4',5,7-Trihydroxyflavone; 5,7,4'-Trihydroxyflavone;	1	4.62615	C01477	Phenylpropanoids and polyketides	Flavonoids	Flavones	NULL	map00941 Flavonoid biosynthesis; map00943 Isoflavonoid biosynthesis; map00944 Flavone and flavonol biosynthesis; map01061 Biosynthesis of phenylpropanoids; map01100 Metabolic pathways; map01110 Biosynthesis of secondary metabolites
4.63_304.0582n	C05911	M+Na, M+K	C15H12O7	39.9	2.97	-0.476918	97.0169	Pentahydroxyflavanone; Dihydrotricetin;	1	4.62615	C05911	null	null	null	NULL	map00941 Flavonoid biosynthesis; map01110 Biosynthesis of secondary metabolites
4.63_304.0582n	C01617	M+Na, M+K	C15H12O7	39.9	2.97	-0.476918	97.0169	Taxifolin; Dihydroquercetin; (+)-Dihydroquercetin; (+)-Taxifolin; trans-Dihydroquercetin;	1	4.62615	C01617	null	null	null	NULL	map00941 Flavonoid biosynthesis; map01061 Biosynthesis of phenylpropanoids; map01100 Metabolic pathways; map01110 Biosynthesis of secondary metabolites
4.22_302.0436n	C10192	M+H-H2O, M+H	C15H10O7	39.7	5.8	3.24702	96.4402	Tricetin; 5,7,3',4',5'-Pentahydroxyflavone;	1	4.21862	C10192	Phenylpropanoids and polyketides	Flavonoids	Flavones	NULL	map00941 Flavonoid biosynthesis
4.63_271.0595m/z	C10044	M+H	C15H10O5	39.7	2.02	-2.04289	98.9392	Galangin; 3,5,7-Trihydroxyflavone;	1	4.62615	C10044	Phenylpropanoids and polyketides	Flavonoids	Flavones	NULL	map00941 Flavonoid biosynthesis
4.63_305.0653m/z	C05909	M+H-H2O	C15H14O8	39.6	1.78	-0.72226	97.0958	Leucodelphinidin;	1	4.62615	C05909	null	null	null	NULL	map00941 Flavonoid biosynthesis; map01110 Biosynthesis of secondary metabolites
4.63_271.0595m/z	C15525	M+H-H2O	C15H12O6	39.6	1.37	-1.91517	98.6909	Eriodictyol chalcone; 2',3,4,4',6'-Pentahydroxychalcone;	1	4.62615	C15525	Phenylpropanoids and polyketides	Linear 1,3-diarylpropanoids	Chalcones and dihydrochalcones	NULL	map00941 Flavonoid biosynthesis
5.19_287.0550m/z	C05911	M+H-H2O	C15H12O7	39.5	0	-0.00146115	97.4019	Pentahydroxyflavanone; Dihydrotricetin;	1	5.1894	C05911	null	null	null	NULL	map00941 Flavonoid biosynthesis; map01110 Biosynthesis of secondary metabolites
5.19_287.0550m/z	C01617	M+H-H2O	C15H12O7	39.5	0	-0.00146115	97.4019	Taxifolin; Dihydroquercetin; (+)-Dihydroquercetin; (+)-Taxifolin; trans-Dihydroquercetin;	1	5.1894	C01617	null	null	null	NULL	map00941 Flavonoid biosynthesis; map01061 Biosynthesis of phenylpropanoids; map01100 Metabolic pathways; map01110 Biosynthesis of secondary metabolites
6.15_272.0682n	C06561	M+H, M+Na, M+H-H2O	C15H12O5	39.5	0	-0.850764	98.498	Naringenin chalcone; 2',4,4',6'-Tetrahydroxychalcone; Isosalipurpol; Chalconaringenin;	1	6.14538	C06561	Phenylpropanoids and polyketides	Linear 1,3-diarylpropanoids	Chalcones and dihydrochalcones	NULL	map00941 Flavonoid biosynthesis; map01061 Biosynthesis of phenylpropanoids; map01100 Metabolic pathways; map01110 Biosynthesis of secondary metabolites
6.15_272.0682n	C00509	M+H, M+Na, M+H-H2O	C15H12O5	39.5	0	-0.850764	98.498	Naringenin; 4',5,7-Trihydroxyflavanone; (2S)-Naringenin; (-)-(2S)-Naringenin;	1	6.14538	C00509	Phenylpropanoids and polyketides	Flavonoids	Flavans	NULL	map00941 Flavonoid biosynthesis; map00943 Isoflavonoid biosynthesis; map01061 Biosynthesis of phenylpropanoids; map01100 Metabolic pathways; map01110 Biosynthesis of secondary metabolites
6.15_272.0682n	C08578	M+H, M+Na, M+H-H2O	C15H12O5	39.5	0	-0.850764	98.498	Butein;	1	6.14538	C08578	null	null	null	NULL	map00941 Flavonoid biosynthesis
6.15_272.0682n	C09614	M+H, M+Na, M+H-H2O	C15H12O5	39.5	0	-0.850764	98.498	Butin; (-)-Butin; 7,3',4'-Trihydroxyflavanone;	1	6.14538	C09614	null	null	null	NULL	map00941 Flavonoid biosynthesis
6.15_272.0682n	C09751	M+H, M+Na, M+H-H2O	C15H12O5	39.5	0	-0.850764	98.498	Garbanzol; 3,7,4'-Trihydroxyflavanone;	1	6.14538	C09751	null	null	null	NULL	map00941 Flavonoid biosynthesis
6.15_272.0682n	C09826	M+H, M+Na, M+H-H2O	C15H12O5	39.5	0	-0.850764	98.498	Pinobanksin; 3,5,7-Trihydroxyflavanone;	1	6.14538	C09826	null	null	null	NULL	map00941 Flavonoid biosynthesis
4.22_289.0698m/z	C15525	M+H	C15H12O6	39.4	3.02	-2.97236	97.2665	Eriodictyol chalcone; 2',3,4,4',6'-Pentahydroxychalcone;	1	4.21862	C15525	Phenylpropanoids and polyketides	Linear 1,3-diarylpropanoids	Chalcones and dihydrochalcones	NULL	map00941 Flavonoid biosynthesis
5.19_287.0550m/z	C01514	M+H	C15H10O6	39.4	0	-0.00154721	97.2043	Luteolin; 3',4',5,7-Tetrahydroxyflavone; 5,7,3',4'-Tetrahydroxyflavone;	1	5.1894	C01514	Phenylpropanoids and polyketides	Flavonoids	Flavones	NULL	map00941 Flavonoid biosynthesis; map00944 Flavone and flavonol biosynthesis; map01100 Metabolic pathways; map01110 Biosynthesis of secondary metabolites
5.19_287.0550m/z	C05903	M+H	C15H10O6	39.4	0	-0.00154721	97.2043	Kaempferol; 3,4',5,7-Tetrahydroxyflavone; 3,5,7-Trihydroxy-2-(4-hydroxyphenyl)-4H-1-benzopyran-4-one; 5,7,4'-Trihydroxyflavonol; C.I. 75640; Indigo yellow; Kaempherol; Kempferol; Nimbecetin; Pelargidenolon; Populnetin; Rhamnolutein; Rhamnolutin; Robigenin; Swartziol; Trifolitin;	1	5.1894	C05903	Phenylpropanoids and polyketides	Flavonoids	Flavones	NULL	map00941 Flavonoid biosynthesis; map00944 Flavone and flavonol biosynthesis; map01061 Biosynthesis of phenylpropanoids; map01100 Metabolic pathways; map01110 Biosynthesis of secondary metabolites
4.94_303.0499m/z	C02906	M+H-H2O	C15H12O8	39.3	0	-0.0509914	96.3219	Dihydromyricetin; Ampelopsin; (+)-Dihydromyricetin; (+)-Ampelopsin;	1	4.93847	C02906	null	null	null	NULL	map00941 Flavonoid biosynthesis; map01110 Biosynthesis of secondary metabolites
4.94_303.0499m/z	C10192	M+H	C15H10O7	39.3	0	-0.0540264	96.5735	Tricetin; 5,7,3',4',5'-Pentahydroxyflavone;	1	4.93847	C10192	Phenylpropanoids and polyketides	Flavonoids	Flavones	NULL	map00941 Flavonoid biosynthesis
4.33_320.0545n	C02906	M+H, M+NH4	C15H12O8	39.2	5.51	4.01237	95.4017	Dihydromyricetin; Ampelopsin; (+)-Dihydromyricetin; (+)-Ampelopsin;	1	4.33292	C02906	null	null	null	NULL	map00941 Flavonoid biosynthesis; map01110 Biosynthesis of secondary metabolites
5.02_295.0568m/z	C06561	M+Na	C15H12O5	39.2	2.65	-3.24158	97.0643	Naringenin chalcone; 2',4,4',6'-Tetrahydroxychalcone; Isosalipurpol; Chalconaringenin;	1	5.02498	C06561	Phenylpropanoids and polyketides	Linear 1,3-diarylpropanoids	Chalcones and dihydrochalcones	NULL	map00941 Flavonoid biosynthesis; map01061 Biosynthesis of phenylpropanoids; map01100 Metabolic pathways; map01110 Biosynthesis of secondary metabolites
5.02_295.0568m/z	C00509	M+Na	C15H12O5	39.2	2.64	-3.24158	97.0643	Naringenin; 4',5,7-Trihydroxyflavanone; (2S)-Naringenin; (-)-(2S)-Naringenin;	1	5.02498	C00509	Phenylpropanoids and polyketides	Flavonoids	Flavans	NULL	map00941 Flavonoid biosynthesis; map00943 Isoflavonoid biosynthesis; map01061 Biosynthesis of phenylpropanoids; map01100 Metabolic pathways; map01110 Biosynthesis of secondary metabolites
5.02_295.0568m/z	C09751	M+Na	C15H12O5	39.2	2.64	-3.24158	97.0643	Garbanzol; 3,7,4'-Trihydroxyflavanone;	1	5.02498	C09751	null	null	null	NULL	map00941 Flavonoid biosynthesis
5.02_295.0568m/z	C09826	M+Na	C15H12O5	39.2	2.64	-3.24158	97.0643	Pinobanksin; 3,5,7-Trihydroxyflavanone;	1	5.02498	C09826	null	null	null	NULL	map00941 Flavonoid biosynthesis
4.95_271.0600m/z	C00974	M+H-H2O	C15H12O6	39.1	0.512	-0.352249	95.2458	Dihydrokaempferol; Aromadendrin; (+)-Dihydrokaempferol; (+)-Aromadendrin;	1	4.95293	C00974	Phenylpropanoids and polyketides	Flavonoids	Flavans	NULL	map00941 Flavonoid biosynthesis; map01061 Biosynthesis of phenylpropanoids; map01100 Metabolic pathways; map01110 Biosynthesis of secondary metabolites
4.71_301.0348m/z	C10107	M+H-H2O	C15H10O8	39.1	0	1.49235	97.0844	Myricetin; 3,5,7,3',4',5'-Hexahydroxyflavone;	1	4.71325	C10107	Phenylpropanoids and polyketides	Flavonoids	Flavones	NULL	map00941 Flavonoid biosynthesis; map00944 Flavone and flavonol biosynthesis
4.95_271.0600m/z	C01477	M+H	C15H10O5	39.1	0.497	-0.375735	95.3915	Apigenin; 4',5,7-Trihydroxyflavone; 5,7,4'-Trihydroxyflavone;	1	4.95293	C01477	Phenylpropanoids and polyketides	Flavonoids	Flavones	NULL	map00941 Flavonoid biosynthesis; map00943 Isoflavonoid biosynthesis; map00944 Flavone and flavonol biosynthesis; map01061 Biosynthesis of phenylpropanoids; map01100 Metabolic pathways; map01110 Biosynthesis of secondary metabolites
4.95_271.0600m/z	C10044	M+H	C15H10O5	39.1	0.497	-0.375735	95.3915	Galangin; 3,5,7-Trihydroxyflavone;	1	4.95293	C10044	Phenylpropanoids and polyketides	Flavonoids	Flavones	NULL	map00941 Flavonoid biosynthesis
4.95_271.0600m/z	C01378	M+H-H2O	C15H12O6	39	0	-0.352249	95.2458	Fustin; 2,3-Dihydrofisetin;	1	4.95293	C01378	null	null	null	NULL	map00941 Flavonoid biosynthesis
4.95_271.0600m/z	C15525	M+H-H2O	C15H12O6	39	0	-0.352249	95.2458	Eriodictyol chalcone; 2',3,4,4',6'-Pentahydroxychalcone;	1	4.95293	C15525	Phenylpropanoids and polyketides	Linear 1,3-diarylpropanoids	Chalcones and dihydrochalcones	NULL	map00941 Flavonoid biosynthesis
5.23_301.0339m/z	C10107	M+H-H2O	C15H10O8	39	0	-1.25635	96.4433	Myricetin; 3,5,7,3',4',5'-Hexahydroxyflavone;	1	5.23227	C10107	Phenylpropanoids and polyketides	Flavonoids	Flavones	NULL	map00941 Flavonoid biosynthesis; map00944 Flavone and flavonol biosynthesis
5.04_277.0466m/z	C12123	M+Na	C15H10O4	38.9	0	-1.98158	96.9084	7,4'-Dihydroxyflavone;	1	5.03938	C12123	null	null	null	NULL	map00941 Flavonoid biosynthesis; map00943 Isoflavonoid biosynthesis
5.04_277.0466m/z	C10028	M+Na	C15H10O4	38.9	0	-1.98158	96.9084	Chrysin; 5,7-Dihydroxyflavone;	1	5.03938	C10028	Phenylpropanoids and polyketides	Flavonoids	Flavones	NULL	map00941 Flavonoid biosynthesis
3.93_320.0532n	C02906	M+H-H2O, M+Na	C15H12O8	38.8	0	-0.127268	94.087	Dihydromyricetin; Ampelopsin; (+)-Dihydromyricetin; (+)-Ampelopsin;	1	3.92645	C02906	null	null	null	NULL	map00941 Flavonoid biosynthesis; map01110 Biosynthesis of secondary metabolites
6.52_271.0608m/z	C05631	M+H-H2O	C15H12O6	38.7	0	2.49344	96.2312	Eriodictyol;	1	6.52327	C05631	Phenylpropanoids and polyketides	Flavonoids	Flavans	NULL	map00941 Flavonoid biosynthesis; map01110 Biosynthesis of secondary metabolites
6.52_271.0608m/z	C00974	M+H-H2O	C15H12O6	38.7	0	2.49344	96.2312	Dihydrokaempferol; Aromadendrin; (+)-Dihydrokaempferol; (+)-Aromadendrin;	1	6.52327	C00974	Phenylpropanoids and polyketides	Flavonoids	Flavans	NULL	map00941 Flavonoid biosynthesis; map01061 Biosynthesis of phenylpropanoids; map01100 Metabolic pathways; map01110 Biosynthesis of secondary metabolites
6.52_271.0608m/z	C01378	M+H-H2O	C15H12O6	38.7	0	2.49344	96.2312	Fustin; 2,3-Dihydrofisetin;	1	6.52327	C01378	null	null	null	NULL	map00941 Flavonoid biosynthesis
6.52_271.0608m/z	C15525	M+H-H2O	C15H12O6	38.7	0	2.49344	96.2312	Eriodictyol chalcone; 2',3,4,4',6'-Pentahydroxychalcone;	1	6.52327	C15525	Phenylpropanoids and polyketides	Linear 1,3-diarylpropanoids	Chalcones and dihydrochalcones	NULL	map00941 Flavonoid biosynthesis
6.52_271.0608m/z	C01477	M+H	C15H10O5	38.7	0	2.65975	96.4834	Apigenin; 4',5,7-Trihydroxyflavone; 5,7,4'-Trihydroxyflavone;	1	6.52327	C01477	Phenylpropanoids and polyketides	Flavonoids	Flavones	NULL	map00941 Flavonoid biosynthesis; map00943 Isoflavonoid biosynthesis; map00944 Flavone and flavonol biosynthesis; map01061 Biosynthesis of phenylpropanoids; map01100 Metabolic pathways; map01110 Biosynthesis of secondary metabolites
6.52_271.0608m/z	C10044	M+H	C15H10O5	38.7	0	2.65975	96.4834	Galangin; 3,5,7-Trihydroxyflavone;	1	6.52327	C10044	Phenylpropanoids and polyketides	Flavonoids	Flavones	NULL	map00941 Flavonoid biosynthesis
6.25_303.0868m/z	C01709	M+H	C16H14O6	38.6	0	1.64705	94.9102	Hesperetin; 3',5,7-Trihydroxy-4'-methoxyflavanone;	1	6.25182	C01709	Phenylpropanoids and polyketides	Flavonoids	O-methylated flavonoids	NULL	map00941 Flavonoid biosynthesis
6.25_303.0868m/z	C09756	M+H	C16H14O6	38.6	0	1.64705	94.9102	Homoeriodictyol; Eriodictyol 3'-methyl ether;	1	6.25182	C09756	null	null	null	NULL	map00941 Flavonoid biosynthesis
6.25_303.0868m/z	C16405	M+H	C16H14O6	38.6	0	1.64705	94.9102	Homoeriodictyol chalcone;	1	6.25182	C16405	null	null	null	NULL	map00941 Flavonoid biosynthesis
5.02_295.0568m/z	C08578	M+Na	C15H12O5	38.6	0	-3.24158	97.0643	Butein;	1	5.02498	C08578	null	null	null	NULL	map00941 Flavonoid biosynthesis
5.02_295.0568m/z	C09614	M+Na	C15H12O5	38.6	0	-3.24158	97.0643	Butin; (-)-Butin; 7,3',4'-Trihydroxyflavanone;	1	5.02498	C09614	null	null	null	NULL	map00941 Flavonoid biosynthesis
4.53_321.0607m/z	C02906	M+H	C15H12O8	38.5	4.74	0.621498	88.3381	Dihydromyricetin; Ampelopsin; (+)-Dihydromyricetin; (+)-Ampelopsin;	1	4.52528	C02906	null	null	null	NULL	map00941 Flavonoid biosynthesis; map01110 Biosynthesis of secondary metabolites
5.78_315.0854m/z	C16418	M+H	C17H14O6	38.4	0	-2.92167	95.5544	Pinobanksin 3-O-acetate;	1	5.78178	C16418	null	null	null	NULL	map00941 Flavonoid biosynthesis
3.71_306.0960m/z	C15525	M+NH4	C15H12O6	38.4	7.53	-4.0713	89.1929	Eriodictyol chalcone; 2',3,4,4',6'-Pentahydroxychalcone;	1	3.7057	C15525	Phenylpropanoids and polyketides	Linear 1,3-diarylpropanoids	Chalcones and dihydrochalcones	NULL	map00941 Flavonoid biosynthesis
5.36_272.0678n	C06561	M+H-H2O, M+Na	C15H12O5	37.9	0	-2.44291	92.2669	Naringenin chalcone; 2',4,4',6'-Tetrahydroxychalcone; Isosalipurpol; Chalconaringenin;	1	5.36102	C06561	Phenylpropanoids and polyketides	Linear 1,3-diarylpropanoids	Chalcones and dihydrochalcones	NULL	map00941 Flavonoid biosynthesis; map01061 Biosynthesis of phenylpropanoids; map01100 Metabolic pathways; map01110 Biosynthesis of secondary metabolites
5.36_272.0678n	C00509	M+H-H2O, M+Na	C15H12O5	37.9	0	-2.44291	92.2669	Naringenin; 4',5,7-Trihydroxyflavanone; (2S)-Naringenin; (-)-(2S)-Naringenin;	1	5.36102	C00509	Phenylpropanoids and polyketides	Flavonoids	Flavans	NULL	map00941 Flavonoid biosynthesis; map00943 Isoflavonoid biosynthesis; map01061 Biosynthesis of phenylpropanoids; map01100 Metabolic pathways; map01110 Biosynthesis of secondary metabolites
5.36_272.0678n	C08578	M+H-H2O, M+Na	C15H12O5	37.9	0	-2.44291	92.2669	Butein;	1	5.36102	C08578	null	null	null	NULL	map00941 Flavonoid biosynthesis
5.36_272.0678n	C09614	M+H-H2O, M+Na	C15H12O5	37.9	0	-2.44291	92.2669	Butin; (-)-Butin; 7,3',4'-Trihydroxyflavanone;	1	5.36102	C09614	null	null	null	NULL	map00941 Flavonoid biosynthesis
5.36_272.0678n	C09751	M+H-H2O, M+Na	C15H12O5	37.9	0	-2.44291	92.2669	Garbanzol; 3,7,4'-Trihydroxyflavanone;	1	5.36102	C09751	null	null	null	NULL	map00941 Flavonoid biosynthesis
5.36_272.0678n	C09826	M+H-H2O, M+Na	C15H12O5	37.9	0	-2.44291	92.2669	Pinobanksin; 3,5,7-Trihydroxyflavanone;	1	5.36102	C09826	null	null	null	NULL	map00941 Flavonoid biosynthesis
8.08_337.1402m/z	C16417	M+H-H2O	C21H22O5	37.8	4.88	-9.11044	94.1086	Xanthohumol;	1	8.08412	C16417	Phenylpropanoids and polyketides	Linear 1,3-diarylpropanoids	Chalcones and dihydrochalcones	NULL	map00941 Flavonoid biosynthesis
6.00_341.1381m/z	C16416	M+H	C20H20O5	37.5	0	-0.817034	88.5035	Desmethylxanthohumol;	1	6.00252	C16416	Phenylpropanoids and polyketides	Linear 1,3-diarylpropanoids	Chalcones and dihydrochalcones	NULL	map00941 Flavonoid biosynthesis
6.15_237.0539m/z	C12123	M+H-H2O	C15H10O4	37.5	0	-2.77794	91.0145	7,4'-Dihydroxyflavone;	1	6.14538	C12123	null	null	null	NULL	map00941 Flavonoid biosynthesis; map00943 Isoflavonoid biosynthesis
6.15_237.0539m/z	C10028	M+H-H2O	C15H10O4	37.5	0	-2.77794	91.0145	Chrysin; 5,7-Dihydroxyflavone;	1	6.14538	C10028	Phenylpropanoids and polyketides	Flavonoids	Flavones	NULL	map00941 Flavonoid biosynthesis
6.60_581.1841m/z	C09789	M+H	C27H32O14	37.4	0	-4.1293	91.6524	Naringin; Naringenin 7-O-neohesperidoside; Naringenin 7-O-[alpha-L-rhamnosyl-(1->2)-beta-D-glucoside];	1	6.60113	C09789	Phenylpropanoids and polyketides	Flavonoids	Flavonoid glycosides	NULL	map00941 Flavonoid biosynthesis
7.50_323.1249m/z	C16416	M+H-H2O	C20H20O5	37.1	0	-8.58321	94.802	Desmethylxanthohumol;	1	7.49978	C16416	Phenylpropanoids and polyketides	Linear 1,3-diarylpropanoids	Chalcones and dihydrochalcones	NULL	map00941 Flavonoid biosynthesis
3.71_306.0960m/z	C05631	M+NH4	C15H12O6	36.9	0	-4.0713	89.1929	Eriodictyol;	1	3.7057	C05631	Phenylpropanoids and polyketides	Flavonoids	Flavans	NULL	map00941 Flavonoid biosynthesis; map01110 Biosynthesis of secondary metabolites
3.71_306.0960m/z	C00974	M+NH4	C15H12O6	36.9	0	-4.0713	89.1929	Dihydrokaempferol; Aromadendrin; (+)-Dihydrokaempferol; (+)-Aromadendrin;	1	3.7057	C00974	Phenylpropanoids and polyketides	Flavonoids	Flavans	NULL	map00941 Flavonoid biosynthesis; map01061 Biosynthesis of phenylpropanoids; map01100 Metabolic pathways; map01110 Biosynthesis of secondary metabolites
3.71_306.0960m/z	C01378	M+NH4	C15H12O6	36.9	0	-4.0713	89.1929	Fustin; 2,3-Dihydrofisetin;	1	3.7057	C01378	null	null	null	NULL	map00941 Flavonoid biosynthesis
4.15_465.1056m/z	C16410	M+H	C21H20O12	36.8	13.8	6.13643	77.313	Bracteatin 6-O-glucoside; Bracteatin 6-O-beta-D-glucoside;	1	4.14718	C16410	null	null	null	NULL	map00941 Flavonoid biosynthesis
7.61_447.0951m/z	C16410	M+H-H2O	C21H20O12	36.8	1.47	6.24345	89.3863	Bracteatin 6-O-glucoside; Bracteatin 6-O-beta-D-glucoside;	1	7.60622	C16410	null	null	null	NULL	map00941 Flavonoid biosynthesis
3.56_329.0444m/z	C03648	M+K	C15H14O6	36.7	0	7.70306	91.921	cis-3,4-Leucopelargonidin;	1	3.56283	C03648	Phenylpropanoids and polyketides	Flavonoids	Flavans	NULL	map00941 Flavonoid biosynthesis; map01100 Metabolic pathways; map01110 Biosynthesis of secondary metabolites
3.56_329.0444m/z	C06562	M+K	C15H14O6	36.7	0	7.70306	91.921	(+)-Catechin; D-Catechin; Cyanidanol; (2R-trans)-2-(3,4-Dihydroxyphenyl)-3,4-dihydro-2H-1-benzopyran-3,5,7-triol; (2R,3S)-Catechin; (2R,3S)-(+)-Catechin; Cianidanol;	1	3.56283	C06562	Phenylpropanoids and polyketides	Flavonoids	Flavans	NULL	map00941 Flavonoid biosynthesis; map01061 Biosynthesis of phenylpropanoids; map01110 Biosynthesis of secondary metabolites
3.56_329.0444m/z	C09727	M+K	C15H14O6	36.7	0	7.70306	91.921	(-)-Epicatechin;	1	3.56283	C09727	Phenylpropanoids and polyketides	Flavonoids	Flavans	NULL	map00941 Flavonoid biosynthesis; map01061 Biosynthesis of phenylpropanoids; map01110 Biosynthesis of secondary metabolites
3.56_329.0444m/z	C05907	M+K	C15H14O6	36.7	0	7.70306	91.921	Luteoforol; 3-Deoxyleucocyanidin;	1	3.56283	C05907	null	null	null	NULL	map00941 Flavonoid biosynthesis
3.56_329.0444m/z	C09736	M+K	C15H14O6	36.7	0	7.70306	91.921	Fisetinidol-4beta-ol; (-)-Mollisacacidin; Fisetinin-3,4-diol; 5-Deoxyleucocyanidin;	1	3.56283	C09736	null	null	null	NULL	map00941 Flavonoid biosynthesis
7.27_321.0627m/z	C02906	M+H	C15H12O8	36.2	0	7.04443	88.8088	Dihydromyricetin; Ampelopsin; (+)-Dihydromyricetin; (+)-Ampelopsin;	1	7.27118	C02906	null	null	null	NULL	map00941 Flavonoid biosynthesis; map01110 Biosynthesis of secondary metabolites
4.55_325.0328m/z	C00389	M+Na	C15H10O7	36	0	3.02877	83.5874	Quercetin; 3,3',4,5,7-Pentahydroxyflavone; 3,5,7,3',4'-Pentahydroxyflavone;	1	4.55402	C00389	Phenylpropanoids and polyketides	Flavonoids	Flavones	NULL	map00941 Flavonoid biosynthesis; map00944 Flavone and flavonol biosynthesis; map01100 Metabolic pathways; map01110 Biosynthesis of secondary metabolites; map04152 AMPK signaling pathway
4.55_325.0328m/z	C10192	M+Na	C15H10O7	36	0	3.02877	83.5874	Tricetin; 5,7,3',4',5'-Pentahydroxyflavone;	1	4.55402	C10192	Phenylpropanoids and polyketides	Flavonoids	Flavones	NULL	map00941 Flavonoid biosynthesis
5.87_273.0769m/z	C03648	M+H-H2O	C15H14O6	35.8	0	4.10456	83.7484	cis-3,4-Leucopelargonidin;	1	5.87393	C03648	Phenylpropanoids and polyketides	Flavonoids	Flavans	NULL	map00941 Flavonoid biosynthesis; map01100 Metabolic pathways; map01110 Biosynthesis of secondary metabolites
5.87_273.0769m/z	C06562	M+H-H2O	C15H14O6	35.8	0	4.10456	83.7484	(+)-Catechin; D-Catechin; Cyanidanol; (2R-trans)-2-(3,4-Dihydroxyphenyl)-3,4-dihydro-2H-1-benzopyran-3,5,7-triol; (2R,3S)-Catechin; (2R,3S)-(+)-Catechin; Cianidanol;	1	5.87393	C06562	Phenylpropanoids and polyketides	Flavonoids	Flavans	NULL	map00941 Flavonoid biosynthesis; map01061 Biosynthesis of phenylpropanoids; map01110 Biosynthesis of secondary metabolites
5.87_273.0769m/z	C09727	M+H-H2O	C15H14O6	35.8	0	4.10456	83.7484	(-)-Epicatechin;	1	5.87393	C09727	Phenylpropanoids and polyketides	Flavonoids	Flavans	NULL	map00941 Flavonoid biosynthesis; map01061 Biosynthesis of phenylpropanoids; map01110 Biosynthesis of secondary metabolites
5.87_273.0769m/z	C05907	M+H-H2O	C15H14O6	35.8	0	4.10456	83.7484	Luteoforol; 3-Deoxyleucocyanidin;	1	5.87393	C05907	null	null	null	NULL	map00941 Flavonoid biosynthesis
5.87_273.0769m/z	C09736	M+H-H2O	C15H14O6	35.8	0	4.10456	83.7484	Fisetinidol-4beta-ol; (-)-Mollisacacidin; Fisetinin-3,4-diol; 5-Deoxyleucocyanidin;	1	5.87393	C09736	null	null	null	NULL	map00941 Flavonoid biosynthesis
5.87_273.0769m/z	C06561	M+H	C15H12O5	35.8	0	4.37628	83.968	Naringenin chalcone; 2',4,4',6'-Tetrahydroxychalcone; Isosalipurpol; Chalconaringenin;	1	5.87393	C06561	Phenylpropanoids and polyketides	Linear 1,3-diarylpropanoids	Chalcones and dihydrochalcones	NULL	map00941 Flavonoid biosynthesis; map01061 Biosynthesis of phenylpropanoids; map01100 Metabolic pathways; map01110 Biosynthesis of secondary metabolites
5.87_273.0769m/z	C00509	M+H	C15H12O5	35.8	0	4.37628	83.968	Naringenin; 4',5,7-Trihydroxyflavanone; (2S)-Naringenin; (-)-(2S)-Naringenin;	1	5.87393	C00509	Phenylpropanoids and polyketides	Flavonoids	Flavans	NULL	map00941 Flavonoid biosynthesis; map00943 Isoflavonoid biosynthesis; map01061 Biosynthesis of phenylpropanoids; map01100 Metabolic pathways; map01110 Biosynthesis of secondary metabolites
5.87_273.0769m/z	C08578	M+H	C15H12O5	35.8	0	4.37628	83.968	Butein;	1	5.87393	C08578	null	null	null	NULL	map00941 Flavonoid biosynthesis
5.87_273.0769m/z	C09614	M+H	C15H12O5	35.8	0	4.37628	83.968	Butin; (-)-Butin; 7,3',4'-Trihydroxyflavanone;	1	5.87393	C09614	null	null	null	NULL	map00941 Flavonoid biosynthesis
5.87_273.0769m/z	C09751	M+H	C15H12O5	35.8	0	4.37628	83.968	Garbanzol; 3,7,4'-Trihydroxyflavanone;	1	5.87393	C09751	null	null	null	NULL	map00941 Flavonoid biosynthesis
5.87_273.0769m/z	C09826	M+H	C15H12O5	35.8	0	4.37628	83.968	Pinobanksin; 3,5,7-Trihydroxyflavanone;	1	5.87393	C09826	null	null	null	NULL	map00941 Flavonoid biosynthesis
5.20_286.0458m/z	C05908	M+H-H2O	C15H11O7+	35.7	0	-4.56599	83.5778	Delphinidin; 3,5,7-Trihydroxy-2-(3,4,5-trihydroxyphenyl)benzopyrylium chloride; Chlorure de 3,5,7-trihydroxy-2-(3,4,5-trihydroxyphenyl)benzopyrylium; 3,5,7-Trihydroxy-2-(3,4,5-trihydroxyphenyl)benzopyryliumchlorid; 3,3',4',5,5',7-Hexahydroxy-2-phenylbenzopyrylium chloride; 3,3',4',5,5',7-Hexahydroxyflavylium chloride; Delfinidol chloride; Delphinidin chloride; Delphinidine; Delphinidol; Ephdine; …	1	5.20368	C05908	Phenylpropanoids and polyketides	Flavonoids	Hydroxyflavonoids	NULL	map00941 Flavonoid biosynthesis; map00942 Anthocyanin biosynthesis; map01110 Biosynthesis of secondary metabolites
6.05_611.1936m/z	C09806	M+H	C28H34O15	35.4	1.02	-5.58921	82.3976	Neohesperidin; Hesperetin 7-O-neohesperidoside;	1	6.04537	C09806	null	null	null	NULL	map00941 Flavonoid biosynthesis
5.23_379.0976m/z	C16416	M+K	C20H20O5	35.3	0	9.8555	87.3259	Desmethylxanthohumol;	1	5.23227	C16416	Phenylpropanoids and polyketides	Linear 1,3-diarylpropanoids	Chalcones and dihydrochalcones	NULL	map00941 Flavonoid biosynthesis
5.08_304.0559m/z	C05908	M+H	C15H11O7+	35.3	0	-6.05818	83.5778	Delphinidin; 3,5,7-Trihydroxy-2-(3,4,5-trihydroxyphenyl)benzopyrylium chloride; Chlorure de 3,5,7-trihydroxy-2-(3,4,5-trihydroxyphenyl)benzopyrylium; 3,5,7-Trihydroxy-2-(3,4,5-trihydroxyphenyl)benzopyryliumchlorid; 3,3',4',5,5',7-Hexahydroxy-2-phenylbenzopyrylium chloride; 3,3',4',5,5',7-Hexahydroxyflavylium chloride; Delfinidol chloride; Delphinidin chloride; Delphinidine; Delphinidol; Ephdine; …	1	5.08253	C05908	Phenylpropanoids and polyketides	Flavonoids	Hydroxyflavonoids	NULL	map00941 Flavonoid biosynthesis; map00942 Anthocyanin biosynthesis; map01110 Biosynthesis of secondary metabolites
4.53_285.0390m/z	C00389	M+H-H2O	C15H10O7	35	5.69	-1.0874	70.6167	Quercetin; 3,3',4,5,7-Pentahydroxyflavone; 3,5,7,3',4'-Pentahydroxyflavone;	1	4.52528	C00389	Phenylpropanoids and polyketides	Flavonoids	Flavones	NULL	map00941 Flavonoid biosynthesis; map00944 Flavone and flavonol biosynthesis; map01100 Metabolic pathways; map01110 Biosynthesis of secondary metabolites; map04152 AMPK signaling pathway
4.53_285.0390m/z	C10192	M+H-H2O	C15H10O7	34.8	4.61	-1.0874	70.6167	Tricetin; 5,7,3',4',5'-Pentahydroxyflavone;	1	4.52528	C10192	Phenylpropanoids and polyketides	Flavonoids	Flavones	NULL	map00941 Flavonoid biosynthesis
4.98_489.0827m/z	C16408	M+K	C21H22O11	34.7	4.35	7.49793	77.5374	2',3,4,4',6'-Peptahydroxychalcone 4'-O-glucoside; PHC 4'-O-glucoside; 2',3,4,4',6'-Pentahydroxychalcone 4'-O-beta-D-glucoside;	1	4.98172	C16408	null	null	null	NULL	map00941 Flavonoid biosynthesis
6.05_269.0433m/z	C01514	M+H-H2O	C15H10O6	33.5	0	-4.00473	72.196	Luteolin; 3',4',5,7-Tetrahydroxyflavone; 5,7,3',4'-Tetrahydroxyflavone;	1	6.04537	C01514	Phenylpropanoids and polyketides	Flavonoids	Flavones	NULL	map00941 Flavonoid biosynthesis; map00944 Flavone and flavonol biosynthesis; map01100 Metabolic pathways; map01110 Biosynthesis of secondary metabolites
6.05_269.0433m/z	C05903	M+H-H2O	C15H10O6	33.5	0	-4.00473	72.196	Kaempferol; 3,4',5,7-Tetrahydroxyflavone; 3,5,7-Trihydroxy-2-(4-hydroxyphenyl)-4H-1-benzopyran-4-one; 5,7,4'-Trihydroxyflavonol; C.I. 75640; Indigo yellow; Kaempherol; Kempferol; Nimbecetin; Pelargidenolon; Populnetin; Rhamnolutein; Rhamnolutin; Robigenin; Swartziol; Trifolitin;	1	6.04537	C05903	Phenylpropanoids and polyketides	Flavonoids	Flavones	NULL	map00941 Flavonoid biosynthesis; map00944 Flavone and flavonol biosynthesis; map01061 Biosynthesis of phenylpropanoids; map01100 Metabolic pathways; map01110 Biosynthesis of secondary metabolites
3.43_321.0827m/z	C05908	M+NH4	C15H11O7+	32.4	0	-5.33442	68.2234	Delphinidin; 3,5,7-Trihydroxy-2-(3,4,5-trihydroxyphenyl)benzopyrylium chloride; Chlorure de 3,5,7-trihydroxy-2-(3,4,5-trihydroxyphenyl)benzopyrylium; 3,5,7-Trihydroxy-2-(3,4,5-trihydroxyphenyl)benzopyryliumchlorid; 3,3',4',5,5',7-Hexahydroxy-2-phenylbenzopyrylium chloride; 3,3',4',5,5',7-Hexahydroxyflavylium chloride; Delfinidol chloride; Delphinidin chloride; Delphinidine; Delphinidol; Ephdine; …	1	3.42782	C05908	Phenylpropanoids and polyketides	Flavonoids	Hydroxyflavonoids	NULL	map00941 Flavonoid biosynthesis; map00942 Anthocyanin biosynthesis; map01110 Biosynthesis of secondary metabolites
4.15_319.0423m/z	C10107	M+H	C15H10O8	31.9	0.892	-8.05208	67.652	Myricetin; 3,5,7,3',4',5'-Hexahydroxyflavone;	1	4.14718	C10107	Phenylpropanoids and polyketides	Flavonoids	Flavones	NULL	map00941 Flavonoid biosynthesis; map00944 Flavone and flavonol biosynthesis
5.39_304.0557m/z	C05908	M+H	C15H11O7+	24.2	0	-6.77132	28.499	Delphinidin; 3,5,7-Trihydroxy-2-(3,4,5-trihydroxyphenyl)benzopyrylium chloride; Chlorure de 3,5,7-trihydroxy-2-(3,4,5-trihydroxyphenyl)benzopyrylium; 3,5,7-Trihydroxy-2-(3,4,5-trihydroxyphenyl)benzopyryliumchlorid; 3,3',4',5,5',7-Hexahydroxy-2-phenylbenzopyrylium chloride; 3,3',4',5,5',7-Hexahydroxyflavylium chloride; Delfinidol chloride; Delphinidin chloride; Delphinidine; Delphinidol; Ephdine; …	1	5.38958	C05908	Phenylpropanoids and polyketides	Flavonoids	Hydroxyflavonoids	NULL	map00941 Flavonoid biosynthesis; map00942 Anthocyanin biosynthesis; map01110 Biosynthesis of secondary metabolites

## Sheet: Flavonoid biosynthesis (neg)
Flavonoid biosynthetic pathway was highly enriched among Ribes meyeri anthocyanins（negative ion mode）
Compound ID	ID	Adducts	Formula	Score	Fragmentation Score	Mass Error (ppm)	Isotope Similarity	Description	Charge	Retention time (min)	KEGG	Super Class	Class	Sub Class	Origin	Pathway
6.50_255.0649m/z	C08650	M-H	C15H12O4	56.2	88.8	-5.48124	98.441	Isoliquiritigenin;	1	6.50077	C08650	Phenylpropanoids and polyketides	Linear 1,3-diarylpropanoids	Chalcones and dihydrochalcones	NULL	map00941 Flavonoid biosynthesis; map01061 Biosynthesis of phenylpropanoids; map01110 Biosynthesis of secondary metabolites
5.89_271.0587m/z	C06561	M-H	C15H12O5	56	92.5	-9.26796	97.6659	Naringenin chalcone; 2',4,4',6'-Tetrahydroxychalcone; Isosalipurpol; Chalconaringenin;	1	5.89428	C06561	Phenylpropanoids and polyketides	Linear 1,3-diarylpropanoids	Chalcones and dihydrochalcones	NULL	map00941 Flavonoid biosynthesis; map01061 Biosynthesis of phenylpropanoids; map01100 Metabolic pathways; map01110 Biosynthesis of secondary metabolites
5.42_269.0439m/z	C10044	M-H	C15H10O5	55.5	89.9	-6.08403	94.43	Galangin; 3,5,7-Trihydroxyflavone;	1	5.42425	C10044	Phenylpropanoids and polyketides	Flavonoids	Flavones	NULL	map00941 Flavonoid biosynthesis
6.50_255.0649m/z	C09762	M-H	C15H12O4	55.4	84.6	-5.48124	98.441	Liquiritigenin; 7,4'-Dihydroxyflavanone;	1	6.50077	C09762	null	null	null	NULL	map00941 Flavonoid biosynthesis; map00943 Isoflavonoid biosynthesis; map01061 Biosynthesis of phenylpropanoids; map01110 Biosynthesis of secondary metabolites
5.89_271.0587m/z	C00509	M-H	C15H12O5	55.1	88.3	-9.26796	97.6659	Naringenin; 4',5,7-Trihydroxyflavanone; (2S)-Naringenin; (-)-(2S)-Naringenin;	1	5.89428	C00509	Phenylpropanoids and polyketides	Flavonoids	Flavans	NULL	map00941 Flavonoid biosynthesis; map00943 Isoflavonoid biosynthesis; map01061 Biosynthesis of phenylpropanoids; map01100 Metabolic pathways; map01110 Biosynthesis of secondary metabolites
5.42_269.0439m/z	C01477	M-H	C15H10O5	54.9	86.9	-6.08403	94.43	Apigenin; 4',5,7-Trihydroxyflavone; 5,7,4'-Trihydroxyflavone;	1	5.42425	C01477	Phenylpropanoids and polyketides	Flavonoids	Flavones	NULL	map00941 Flavonoid biosynthesis; map00943 Isoflavonoid biosynthesis; map00944 Flavone and flavonol biosynthesis; map01061 Biosynthesis of phenylpropanoids; map01100 Metabolic pathways; map01110 Biosynthesis of secondary metabolites
5.89_271.0587m/z	C09826	M-H	C15H12O5	54.3	83.8	-9.26796	97.6659	Pinobanksin; 3,5,7-Trihydroxyflavanone;	1	5.89428	C09826	null	null	null	NULL	map00941 Flavonoid biosynthesis
5.37_271.0592m/z	C06561	M-H	C15H12O5	52.3	72.1	-7.30907	97.8403	Naringenin chalcone; 2',4,4',6'-Tetrahydroxychalcone; Isosalipurpol; Chalconaringenin;	1	5.3671	C06561	Phenylpropanoids and polyketides	Linear 1,3-diarylpropanoids	Chalcones and dihydrochalcones	NULL	map00941 Flavonoid biosynthesis; map01061 Biosynthesis of phenylpropanoids; map01100 Metabolic pathways; map01110 Biosynthesis of secondary metabolites
5.37_271.0592m/z	C00509	M-H	C15H12O5	52.3	72.1	-7.30907	97.8403	Naringenin; 4',5,7-Trihydroxyflavanone; (2S)-Naringenin; (-)-(2S)-Naringenin;	1	5.3671	C00509	Phenylpropanoids and polyketides	Flavonoids	Flavans	NULL	map00941 Flavonoid biosynthesis; map00943 Isoflavonoid biosynthesis; map01061 Biosynthesis of phenylpropanoids; map01100 Metabolic pathways; map01110 Biosynthesis of secondary metabolites
5.37_271.0592m/z	C08578	M-H	C15H12O5	52.3	72.1	-7.30907	97.8403	Butein;	1	5.3671	C08578	null	null	null	NULL	map00941 Flavonoid biosynthesis
5.37_271.0592m/z	C09614	M-H	C15H12O5	52.3	72.1	-7.30907	97.8403	Butin; (-)-Butin; 7,3',4'-Trihydroxyflavanone;	1	5.3671	C09614	null	null	null	NULL	map00941 Flavonoid biosynthesis
5.37_271.0592m/z	C09751	M-H	C15H12O5	52.3	72.1	-7.30907	97.8403	Garbanzol; 3,7,4'-Trihydroxyflavanone;	1	5.3671	C09751	null	null	null	NULL	map00941 Flavonoid biosynthesis
5.37_271.0592m/z	C09826	M-H	C15H12O5	52.3	72.1	-7.30907	97.8403	Pinobanksin; 3,5,7-Trihydroxyflavanone;	1	5.3671	C09826	null	null	null	NULL	map00941 Flavonoid biosynthesis
6.26_301.0734m/z	C16405	M-H	C16H14O6	51.3	79.6	5.33287	82.8543	Homoeriodictyol chalcone;	1	6.25788	C16405	null	null	null	NULL	map00941 Flavonoid biosynthesis
5.42_301.0696m/z	C01709	M-H	C16H14O6	51	70.7	-7.26273	92.6534	Hesperetin; 3',5,7-Trihydroxy-4'-methoxyflavanone;	1	5.42425	C01709	Phenylpropanoids and polyketides	Flavonoids	O-methylated flavonoids	NULL	map00941 Flavonoid biosynthesis
5.42_301.0696m/z	C09756	M-H	C16H14O6	51	70.7	-7.26273	92.6534	Homoeriodictyol; Eriodictyol 3'-methyl ether;	1	5.42425	C09756	null	null	null	NULL	map00941 Flavonoid biosynthesis
5.42_301.0696m/z	C16405	M-H	C16H14O6	51	70.7	-7.26273	92.6534	Homoeriodictyol chalcone;	1	5.42425	C16405	null	null	null	NULL	map00941 Flavonoid biosynthesis
6.26_301.0734m/z	C01709	M-H	C16H14O6	49.9	72.8	5.33287	82.8543	Hesperetin; 3',5,7-Trihydroxy-4'-methoxyflavanone;	1	6.25788	C01709	Phenylpropanoids and polyketides	Flavonoids	O-methylated flavonoids	NULL	map00941 Flavonoid biosynthesis
6.26_301.0734m/z	C09756	M-H	C16H14O6	49.9	72.8	5.33287	82.8543	Homoeriodictyol; Eriodictyol 3'-methyl ether;	1	6.25788	C09756	null	null	null	NULL	map00941 Flavonoid biosynthesis
4.45_447.0921m/z	C16409	M-H	C21H20O11	49	49.8	-2.58708	98.0713	Aureusidin 6-O-glucoside; Aureusidin 6-O-beta-D-glucoside;	1	4.4472	C16409	null	null	null	NULL	map00941 Flavonoid biosynthesis
6.20_285.0391m/z	C01514	M-H	C15H10O6	48.7	49	-4.58651	99.6925	Luteolin; 3',4',5,7-Tetrahydroxyflavone; 5,7,3',4'-Tetrahydroxyflavone;	1	6.20073	C01514	Phenylpropanoids and polyketides	Flavonoids	Flavones	NULL	map00941 Flavonoid biosynthesis; map00944 Flavone and flavonol biosynthesis; map01100 Metabolic pathways; map01110 Biosynthesis of secondary metabolites
6.20_285.0391m/z	C05903	M-H	C15H10O6	48.7	49	-4.58651	99.6925	Kaempferol; 3,4',5,7-Tetrahydroxyflavone; 3,5,7-Trihydroxy-2-(4-hydroxyphenyl)-4H-1-benzopyran-4-one; 5,7,4'-Trihydroxyflavonol; C.I. 75640; Indigo yellow; Kaempherol; Kempferol; Nimbecetin; Pelargidenolon; Populnetin; Rhamnolutein; Rhamnolutin; Robigenin; Swartziol; Trifolitin;	1	6.20073	C05903	Phenylpropanoids and polyketides	Flavonoids	Flavones	NULL	map00941 Flavonoid biosynthesis; map00944 Flavone and flavonol biosynthesis; map01061 Biosynthesis of phenylpropanoids; map01100 Metabolic pathways; map01110 Biosynthesis of secondary metabolites
4.60_431.0965m/z	C01460	M-H	C21H20O10	43.6	40.2	-4.33243	83.0213	Vitexin; Apigenin 8-C-glucoside;	1	4.59677	C01460	null	null	null	NULL	map00941 Flavonoid biosynthesis; map00944 Flavone and flavonol biosynthesis
3.93_317.0284m/z	C10107	M-H	C15H10O8	41.9	19.9	-5.95337	96.6574	Myricetin; 3,5,7,3',4',5'-Hexahydroxyflavone;	1	3.92643	C10107	Phenylpropanoids and polyketides	Flavonoids	Flavones	NULL	map00941 Flavonoid biosynthesis; map00944 Flavone and flavonol biosynthesis
0.71_467.0769m/z	C01460	M+Cl	C21H20O10	41.3	23.5	4.34937	88.0495	Vitexin; Apigenin 8-C-glucoside;	1	0.7112	C01460	null	null	null	NULL	map00941 Flavonoid biosynthesis; map00944 Flavone and flavonol biosynthesis
5.62_317.0289m/z	C10107	M-H	C15H10O8	40	6.8	-4.33168	98.0334	Myricetin; 3,5,7,3',4',5'-Hexahydroxyflavone;	1	5.6164	C10107	Phenylpropanoids and polyketides	Flavonoids	Flavones	NULL	map00941 Flavonoid biosynthesis; map00944 Flavone and flavonol biosynthesis
3.94_301.0336m/z	C00389	M-H	C15H10O7	39.2	6.64	-5.77307	96.0379	Quercetin; 3,3',4,5,7-Pentahydroxyflavone; 3,5,7,3',4'-Pentahydroxyflavone;	1	3.94073	C00389	Phenylpropanoids and polyketides	Flavonoids	Flavones	NULL	map00941 Flavonoid biosynthesis; map00944 Flavone and flavonol biosynthesis; map01100 Metabolic pathways; map01110 Biosynthesis of secondary metabolites; map04152 AMPK signaling pathway
3.94_301.0336m/z	C10192	M-H	C15H10O7	39.2	6.64	-5.77307	96.0379	Tricetin; 5,7,3',4',5'-Pentahydroxyflavone;	1	3.94073	C10192	Phenylpropanoids and polyketides	Flavonoids	Flavones	NULL	map00941 Flavonoid biosynthesis
4.64_303.0496m/z	C05911	M-H	C15H12O7	38.8	0	-4.83177	99.4093	Pentahydroxyflavanone; Dihydrotricetin;	1	4.63963	C05911	null	null	null	NULL	map00941 Flavonoid biosynthesis; map01110 Biosynthesis of secondary metabolites
4.64_303.0496m/z	C01617	M-H	C15H12O7	38.8	0	-4.83177	99.4093	Taxifolin; Dihydroquercetin; (+)-Dihydroquercetin; (+)-Taxifolin; trans-Dihydroquercetin;	1	4.63963	C01617	null	null	null	NULL	map00941 Flavonoid biosynthesis; map01061 Biosynthesis of phenylpropanoids; map01100 Metabolic pathways; map01110 Biosynthesis of secondary metabolites
6.05_269.0443m/z	C01477	M-H	C15H10O5	38.8	0	-4.70394	99.4216	Apigenin; 4',5,7-Trihydroxyflavone; 5,7,4'-Trihydroxyflavone;	1	6.05143	C01477	Phenylpropanoids and polyketides	Flavonoids	Flavones	NULL	map00941 Flavonoid biosynthesis; map00943 Isoflavonoid biosynthesis; map00944 Flavone and flavonol biosynthesis; map01061 Biosynthesis of phenylpropanoids; map01100 Metabolic pathways; map01110 Biosynthesis of secondary metabolites
6.05_269.0443m/z	C10044	M-H	C15H10O5	38.8	0	-4.70394	99.4216	Galangin; 3,5,7-Trihydroxyflavone;	1	6.05143	C10044	Phenylpropanoids and polyketides	Flavonoids	Flavones	NULL	map00941 Flavonoid biosynthesis
6.14_271.0603m/z	C06561	M-H	C15H12O5	38.7	0	-3.23493	97.1141	Naringenin chalcone; 2',4,4',6'-Tetrahydroxychalcone; Isosalipurpol; Chalconaringenin;	1	6.13715	C06561	Phenylpropanoids and polyketides	Linear 1,3-diarylpropanoids	Chalcones and dihydrochalcones	NULL	map00941 Flavonoid biosynthesis; map01061 Biosynthesis of phenylpropanoids; map01100 Metabolic pathways; map01110 Biosynthesis of secondary metabolites
6.14_271.0603m/z	C00509	M-H	C15H12O5	38.7	0	-3.23493	97.1141	Naringenin; 4',5,7-Trihydroxyflavanone; (2S)-Naringenin; (-)-(2S)-Naringenin;	1	6.13715	C00509	Phenylpropanoids and polyketides	Flavonoids	Flavans	NULL	map00941 Flavonoid biosynthesis; map00943 Isoflavonoid biosynthesis; map01061 Biosynthesis of phenylpropanoids; map01100 Metabolic pathways; map01110 Biosynthesis of secondary metabolites
6.14_271.0603m/z	C08578	M-H	C15H12O5	38.7	0	-3.23493	97.1141	Butein;	1	6.13715	C08578	null	null	null	NULL	map00941 Flavonoid biosynthesis
6.14_271.0603m/z	C09614	M-H	C15H12O5	38.7	0	-3.23493	97.1141	Butin; (-)-Butin; 7,3',4'-Trihydroxyflavanone;	1	6.13715	C09614	null	null	null	NULL	map00941 Flavonoid biosynthesis
6.14_271.0603m/z	C09751	M-H	C15H12O5	38.7	0	-3.23493	97.1141	Garbanzol; 3,7,4'-Trihydroxyflavanone;	1	6.13715	C09751	null	null	null	NULL	map00941 Flavonoid biosynthesis
6.14_271.0603m/z	C09826	M-H	C15H12O5	38.7	0	-3.23493	97.1141	Pinobanksin; 3,5,7-Trihydroxyflavanone;	1	6.13715	C09826	null	null	null	NULL	map00941 Flavonoid biosynthesis
6.82_285.0379m/z	C01514	M-H	C15H10O6	38.6	6.19	-9.07136	96.6216	Luteolin; 3',4',5,7-Tetrahydroxyflavone; 5,7,3',4'-Tetrahydroxyflavone;	1	6.8215	C01514	Phenylpropanoids and polyketides	Flavonoids	Flavones	NULL	map00941 Flavonoid biosynthesis; map00944 Flavone and flavonol biosynthesis; map01100 Metabolic pathways; map01110 Biosynthesis of secondary metabolites
5.20_285.0391m/z	C01514	M-H	C15H10O6	38.6	0	-4.91487	98.5954	Luteolin; 3',4',5,7-Tetrahydroxyflavone; 5,7,3',4'-Tetrahydroxyflavone;	1	5.19565	C01514	Phenylpropanoids and polyketides	Flavonoids	Flavones	NULL	map00941 Flavonoid biosynthesis; map00944 Flavone and flavonol biosynthesis; map01100 Metabolic pathways; map01110 Biosynthesis of secondary metabolites
6.82_285.0379m/z	C05903	M-H	C15H10O6	38.6	6.42	-9.07136	96.6216	Kaempferol; 3,4',5,7-Tetrahydroxyflavone; 3,5,7-Trihydroxy-2-(4-hydroxyphenyl)-4H-1-benzopyran-4-one; 5,7,4'-Trihydroxyflavonol; C.I. 75640; Indigo yellow; Kaempherol; Kempferol; Nimbecetin; Pelargidenolon; Populnetin; Rhamnolutein; Rhamnolutin; Robigenin; Swartziol; Trifolitin;	1	6.8215	C05903	Phenylpropanoids and polyketides	Flavonoids	Flavones	NULL	map00941 Flavonoid biosynthesis; map00944 Flavone and flavonol biosynthesis; map01061 Biosynthesis of phenylpropanoids; map01100 Metabolic pathways; map01110 Biosynthesis of secondary metabolites
5.20_285.0391m/z	C05903	M-H	C15H10O6	38.6	0	-4.91487	98.5954	Kaempferol; 3,4',5,7-Tetrahydroxyflavone; 3,5,7-Trihydroxy-2-(4-hydroxyphenyl)-4H-1-benzopyran-4-one; 5,7,4'-Trihydroxyflavonol; C.I. 75640; Indigo yellow; Kaempherol; Kempferol; Nimbecetin; Pelargidenolon; Populnetin; Rhamnolutein; Rhamnolutin; Robigenin; Swartziol; Trifolitin;	1	5.19565	C05903	Phenylpropanoids and polyketides	Flavonoids	Flavones	NULL	map00941 Flavonoid biosynthesis; map00944 Flavone and flavonol biosynthesis; map01061 Biosynthesis of phenylpropanoids; map01100 Metabolic pathways; map01110 Biosynthesis of secondary metabolites
5.89_271.0587m/z	C08578	M-H	C15H12O5	38.5	5.14	-9.26796	97.6659	Butein;	1	5.89428	C08578	null	null	null	NULL	map00941 Flavonoid biosynthesis
5.89_271.0587m/z	C09614	M-H	C15H12O5	38.5	5.14	-9.26796	97.6659	Butin; (-)-Butin; 7,3',4'-Trihydroxyflavanone;	1	5.89428	C09614	null	null	null	NULL	map00941 Flavonoid biosynthesis
5.89_271.0587m/z	C09751	M-H	C15H12O5	38.4	4.48	-9.26796	97.6659	Garbanzol; 3,7,4'-Trihydroxyflavanone;	1	5.89428	C09751	null	null	null	NULL	map00941 Flavonoid biosynthesis
6.50_255.0649m/z	C09827	M-H	C15H12O4	38.4	0	-5.48124	98.441	Pinocembrin; 5,7-Dihydroxyflavanone;	1	6.50077	C09827	Phenylpropanoids and polyketides	Flavonoids	Flavans	NULL	map00941 Flavonoid biosynthesis
6.50_255.0649m/z	C16404	M-H	C15H12O4	38.4	0	-5.48124	98.441	Pinocembrin chalcone;	1	6.50077	C16404	null	null	null	NULL	map00941 Flavonoid biosynthesis
4.33_319.0441m/z	C02906	M-H	C15H12O8	38.3	0	-5.79486	98.3464	Dihydromyricetin; Ampelopsin; (+)-Dihydromyricetin; (+)-Ampelopsin;	1	4.3329	C02906	null	null	null	NULL	map00941 Flavonoid biosynthesis; map01110 Biosynthesis of secondary metabolites
4.80_485.0900m/z	C16408	M+Cl	C21H22O11	38.3	8.14	9.77248	93.8982	2',3,4,4',6'-Peptahydroxychalcone 4'-O-glucoside; PHC 4'-O-glucoside; 2',3,4,4',6'-Pentahydroxychalcone 4'-O-beta-D-glucoside;	1	4.79688	C16408	null	null	null	NULL	map00941 Flavonoid biosynthesis
5.13_301.0708m/z	C01709	M-H	C16H14O6	38.3	0	-3.14882	95.4059	Hesperetin; 3',5,7-Trihydroxy-4'-methoxyflavanone;	1	5.13207	C01709	Phenylpropanoids and polyketides	Flavonoids	O-methylated flavonoids	NULL	map00941 Flavonoid biosynthesis
5.13_301.0708m/z	C09756	M-H	C16H14O6	38.3	0	-3.14882	95.4059	Homoeriodictyol; Eriodictyol 3'-methyl ether;	1	5.13207	C09756	null	null	null	NULL	map00941 Flavonoid biosynthesis
5.13_301.0708m/z	C16405	M-H	C16H14O6	38.3	0	-3.14882	95.4059	Homoeriodictyol chalcone;	1	5.13207	C16405	null	null	null	NULL	map00941 Flavonoid biosynthesis
5.25_319.0440m/z	C02906	M-H	C15H12O8	38.2	0	-6.03557	97.7241	Dihydromyricetin; Ampelopsin; (+)-Dihydromyricetin; (+)-Ampelopsin;	1	5.2528	C02906	null	null	null	NULL	map00941 Flavonoid biosynthesis; map01110 Biosynthesis of secondary metabolites
6.07_301.0338m/z	C00389	M-H	C15H10O7	38.2	0	-5.14602	96.8671	Quercetin; 3,3',4,5,7-Pentahydroxyflavone; 3,5,7,3',4'-Pentahydroxyflavone;	1	6.06573	C00389	Phenylpropanoids and polyketides	Flavonoids	Flavones	NULL	map00941 Flavonoid biosynthesis; map00944 Flavone and flavonol biosynthesis; map01100 Metabolic pathways; map01110 Biosynthesis of secondary metabolites; map04152 AMPK signaling pathway
4.54_301.0338m/z	C00389	M-H	C15H10O7	38.2	0	-5.14599	97.0298	Quercetin; 3,3',4,5,7-Pentahydroxyflavone; 3,5,7,3',4'-Pentahydroxyflavone;	1	4.53962	C00389	Phenylpropanoids and polyketides	Flavonoids	Flavones	NULL	map00941 Flavonoid biosynthesis; map00944 Flavone and flavonol biosynthesis; map01100 Metabolic pathways; map01110 Biosynthesis of secondary metabolites; map04152 AMPK signaling pathway
4.13_463.0868m/z	C16410	M-H	C21H20O12	38.2	8.51	-2.9574	86.2283	Bracteatin 6-O-glucoside; Bracteatin 6-O-beta-D-glucoside;	1	4.13288	C16410	null	null	null	NULL	map00941 Flavonoid biosynthesis
4.67_349.0500m/z	C16418	M+Cl	C17H14O6	38.2	0.924	5.06335	95.6863	Pinobanksin 3-O-acetate;	1	4.6682	C16418	null	null	null	NULL	map00941 Flavonoid biosynthesis
6.07_301.0338m/z	C10192	M-H	C15H10O7	38.2	0	-5.14602	96.8671	Tricetin; 5,7,3',4',5'-Pentahydroxyflavone;	1	6.06573	C10192	Phenylpropanoids and polyketides	Flavonoids	Flavones	NULL	map00941 Flavonoid biosynthesis
4.54_301.0338m/z	C10192	M-H	C15H10O7	38.2	0	-5.14599	97.0298	Tricetin; 5,7,3',4',5'-Pentahydroxyflavone;	1	4.53962	C10192	Phenylpropanoids and polyketides	Flavonoids	Flavones	NULL	map00941 Flavonoid biosynthesis
6.14_317.0283m/z	C10107	M-H	C15H10O8	38.1	0	-6.10644	97.334	Myricetin; 3,5,7,3',4',5'-Hexahydroxyflavone;	1	6.13715	C10107	Phenylpropanoids and polyketides	Flavonoids	Flavones	NULL	map00941 Flavonoid biosynthesis; map00944 Flavone and flavonol biosynthesis
5.87_463.0868m/z	C16410	M-H	C21H20O12	38.1	0	-2.97006	94.1065	Bracteatin 6-O-glucoside; Bracteatin 6-O-beta-D-glucoside;	1	5.86572	C16410	null	null	null	NULL	map00941 Flavonoid biosynthesis
5.25_467.0769m/z	C01460	M+Cl	C21H20O10	38	0	4.27034	95.1804	Vitexin; Apigenin 8-C-glucoside;	1	5.2528	C01460	null	null	null	NULL	map00941 Flavonoid biosynthesis; map00944 Flavone and flavonol biosynthesis
5.60_301.0700m/z	C01709	M-H	C16H14O6	37.7	0	-5.75824	94.891	Hesperetin; 3',5,7-Trihydroxy-4'-methoxyflavanone;	1	5.60212	C01709	Phenylpropanoids and polyketides	Flavonoids	O-methylated flavonoids	NULL	map00941 Flavonoid biosynthesis
5.60_301.0700m/z	C09756	M-H	C16H14O6	37.7	0	-5.75824	94.891	Homoeriodictyol; Eriodictyol 3'-methyl ether;	1	5.60212	C09756	null	null	null	NULL	map00941 Flavonoid biosynthesis
5.60_301.0700m/z	C16405	M-H	C16H14O6	37.7	0	-5.75824	94.891	Homoeriodictyol chalcone;	1	5.60212	C16405	null	null	null	NULL	map00941 Flavonoid biosynthesis
2.54_303.0508m/z	C05911	M-H	C15H12O7	37.6	0	-0.615197	88.8863	Pentahydroxyflavanone; Dihydrotricetin;	1	2.54348	C05911	null	null	null	NULL	map00941 Flavonoid biosynthesis; map01110 Biosynthesis of secondary metabolites
2.54_303.0508m/z	C01617	M-H	C15H12O7	37.6	0	-0.615197	88.8863	Taxifolin; Dihydroquercetin; (+)-Dihydroquercetin; (+)-Taxifolin; trans-Dihydroquercetin;	1	2.54348	C01617	null	null	null	NULL	map00941 Flavonoid biosynthesis; map01061 Biosynthesis of phenylpropanoids; map01100 Metabolic pathways; map01110 Biosynthesis of secondary metabolites
5.76_431.0947m/z	C01460	M-H	C21H20O10	36.9	0	-8.40752	93.6534	Vitexin; Apigenin 8-C-glucoside;	1	5.75927	C01460	null	null	null	NULL	map00941 Flavonoid biosynthesis; map00944 Flavone and flavonol biosynthesis
4.26_483.0726m/z	C16409	M+Cl	C21H20O11	36.9	4.1	5.85502	87.0284	Aureusidin 6-O-glucoside; Aureusidin 6-O-beta-D-glucoside;	1	4.26147	C16409	null	null	null	NULL	map00941 Flavonoid biosynthesis
3.36_339.1264m/z	C16416	M-H	C20H20O5	36.6	0	7.56438	91.4915	Desmethylxanthohumol;	1	3.35638	C16416	Phenylpropanoids and polyketides	Linear 1,3-diarylpropanoids	Chalcones and dihydrochalcones	NULL	map00941 Flavonoid biosynthesis
4.55_321.0647m/z	C05909	M-H	C15H14O8	36.4	0	9.63746	92.5737	Leucodelphinidin;	1	4.55392	C05909	null	null	null	NULL	map00941 Flavonoid biosynthesis; map01110 Biosynthesis of secondary metabolites
0.73_463.0849m/z	C16410	M-H	C21H20O12	36.1	1.1	-7.19649	87.4796	Bracteatin 6-O-glucoside; Bracteatin 6-O-beta-D-glucoside;	1	0.725483	C16410	null	null	null	NULL	map00941 Flavonoid biosynthesis
3.94_319.0445m/z	C02906	M-H	C15H12O8	36	6.44	-4.40114	78.7579	Dihydromyricetin; Ampelopsin; (+)-Dihydromyricetin; (+)-Ampelopsin;	1	3.94073	C02906	null	null	null	NULL	map00941 Flavonoid biosynthesis; map01110 Biosynthesis of secondary metabolites
2.29_303.0498m/z	C05911	M-H	C15H12O7	35.7	0	-4.16514	83.5682	Pentahydroxyflavanone; Dihydrotricetin;	1	2.29417	C05911	null	null	null	NULL	map00941 Flavonoid biosynthesis; map01110 Biosynthesis of secondary metabolites
2.29_303.0498m/z	C01617	M-H	C15H12O7	35.7	0	-4.16514	83.5682	Taxifolin; Dihydroquercetin; (+)-Dihydroquercetin; (+)-Taxifolin; trans-Dihydroquercetin;	1	2.29417	C01617	null	null	null	NULL	map00941 Flavonoid biosynthesis; map01061 Biosynthesis of phenylpropanoids; map01100 Metabolic pathways; map01110 Biosynthesis of secondary metabolites
5.02_337.0091m/z	C00389	M+Cl	C15H10O7	35.7	5.31	-9.61968	83.5874	Quercetin; 3,3',4,5,7-Pentahydroxyflavone; 3,5,7,3',4'-Pentahydroxyflavone;	1	5.01775	C00389	Phenylpropanoids and polyketides	Flavonoids	Flavones	NULL	map00941 Flavonoid biosynthesis; map00944 Flavone and flavonol biosynthesis; map01100 Metabolic pathways; map01110 Biosynthesis of secondary metabolites; map04152 AMPK signaling pathway
5.27_431.0971m/z	C01460	M-H	C21H20O10	35.7	0	-2.98987	82.1857	Vitexin; Apigenin 8-C-glucoside;	1	5.26708	C01460	null	null	null	NULL	map00941 Flavonoid biosynthesis; map00944 Flavone and flavonol biosynthesis
5.38_463.0883m/z	C16410	M-H	C21H20O12	35.7	0	0.190743	78.8272	Bracteatin 6-O-glucoside; Bracteatin 6-O-beta-D-glucoside;	1	5.38138	C16410	null	null	null	NULL	map00941 Flavonoid biosynthesis
3.36_375.1034m/z	C16416	M+Cl	C20H20O5	35.6	0	8.58244	87.2809	Desmethylxanthohumol;	1	3.35638	C16416	Phenylpropanoids and polyketides	Linear 1,3-diarylpropanoids	Chalcones and dihydrochalcones	NULL	map00941 Flavonoid biosynthesis
6.52_269.0437m/z	C01477	M-H	C15H10O5	35.2	0	-6.86482	83.9873	Apigenin; 4',5,7-Trihydroxyflavone; 5,7,4'-Trihydroxyflavone;	1	6.51862	C01477	Phenylpropanoids and polyketides	Flavonoids	Flavones	NULL	map00941 Flavonoid biosynthesis; map00943 Isoflavonoid biosynthesis; map00944 Flavone and flavonol biosynthesis; map01061 Biosynthesis of phenylpropanoids; map01100 Metabolic pathways; map01110 Biosynthesis of secondary metabolites
6.14_253.0488m/z	C12123	M-H	C15H10O4	35.2	0	-7.24705	84.1885	7,4'-Dihydroxyflavone;	1	6.13715	C12123	null	null	null	NULL	map00941 Flavonoid biosynthesis; map00943 Isoflavonoid biosynthesis
6.14_253.0488m/z	C10028	M-H	C15H10O4	35.2	0	-7.24705	84.1885	Chrysin; 5,7-Dihydroxyflavone;	1	6.13715	C10028	Phenylpropanoids and polyketides	Flavonoids	Flavones	NULL	map00941 Flavonoid biosynthesis
6.52_269.0437m/z	C10044	M-H	C15H10O5	35.2	0	-6.86482	83.9873	Galangin; 3,5,7-Trihydroxyflavone;	1	6.51862	C10044	Phenylpropanoids and polyketides	Flavonoids	Flavones	NULL	map00941 Flavonoid biosynthesis
5.02_337.0091m/z	C10192	M+Cl	C15H10O7	34.9	1.29	-9.61968	83.5874	Tricetin; 5,7,3',4',5'-Pentahydroxyflavone;	1	5.01775	C10192	Phenylpropanoids and polyketides	Flavonoids	Flavones	NULL	map00941 Flavonoid biosynthesis
5.79_313.0687m/z	C16418	M-H	C17H14O6	34.3	0	-9.63371	81.9699	Pinobanksin 3-O-acetate;	1	5.78785	C16418	null	null	null	NULL	map00941 Flavonoid biosynthesis
5.15_463.0866m/z	C16410	M-H	C21H20O12	34.3	2.04	-3.42269	73.5936	Bracteatin 6-O-glucoside; Bracteatin 6-O-beta-D-glucoside;	1	5.14637	C16410	null	null	null	NULL	map00941 Flavonoid biosynthesis
